# Supplementary material for: Decomposing the effective radiative forcing of anthropogenic aerosols based on CMIP6 Earth system models
Source: Copernicus journal article supplement (doi:10.5194/acp-24-7837-2024), 2024-07-10
Supplement: Supplementary file 1 [file acp-24-7837-2024-supplement.pdf]

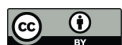

*Supplement of*

## **Decomposing the effective radiative forcing of anthropogenic aerosols based on CMIP6 Earth system models**

**Alkiviadis Kalisoras et al.**

*Correspondence to:* Alkiviadis Kalisoras (kalisort@geo.auth.gr)

The copyright of individual parts of the supplement might differ from the article licence.

**Table S1.** AOD differences for the piClim experiments (piClim-aer, piClim-SO<sub>2</sub>, piClim-OC and piClim-BC), and the transient (histSST) experiment averaged over the 1995-2014 period. Global mean  $\Delta$ AOD values are presented for each ESM, along with the multi-model ensemble mean and the inter-model variability (one standard deviation; SD).

| Model             | piClim-aer | piClim-SO <sub>2</sub> | piClim-OC | piClim-BC | histSST (1995-2014) |          |         |         |
|-------------------|------------|------------------------|-----------|-----------|---------------------|----------|---------|---------|
|                   | od550aer   | od550aer               | od550aer  | od550aer  | od550aer            | od550so4 | od550oa | od550bc |
| CNRM-ESM2-1       | 0.0161     | 0.0119                 | 0.0028    | 0.0017    | 0.0166              | 0.0127   | 0.0027  | 0.0013  |
| EC-Earth3-AerChem | 0.0369     | -                      | -         | -         | 0.0380              | 0.0225   | 0.0129  | 0.0016  |
| GFDL-ESM4         | 0.0410     | 0.0173                 | 0.0054    | 0.0067    | 0.0411              | 0.0301   | 0.0049  | 0.0027  |
| MPI-ESM1-2-HAM    | 0.0257     | 0.0186                 | 0.0060    | 0.0043    | 0.0255              | -        | -       | -       |
| MRI-ESM2-0        | 0.0346     | 0.0272                 | 0.0037    | 0.0057    | -                   | -        | -       | -       |
| NorESM2-LM        | 0.0218     | 0.0139                 | 0.0050    | 0.0029    | 0.0239              | 0.0110   | 0.0089  | 0.0016  |
| UKESM1-0-LL       | 0.0329     | 0.0260                 | 0.0044    | 0.0029    | 0.0363              | -        | -       | -       |
| ENSEMBLE (Mean)   | 0.0299     | 0.0191                 | 0.0046    | 0.0040    | 0.0302              | 0.0191   | 0.0073  | 0.0018  |
| ENSEMBLE (SD)     | 0.0082     | 0.0057                 | 0.0011    | 0.0018    | 0.0088              | 0.0077   | 0.0039  | 0.0005  |

**Table S2.** Global mean SW ERF values (in  $W m^{-2}$ ) for the piClim experiments (piClim-aer, piClim-SO<sub>2</sub>, piClim-OC and piClim-BC). ERF<sub>TOTAL</sub>, ERF<sub>ARI</sub>, ERF<sub>ACI</sub> and ERF<sub>ALB</sub> are presented for each ESM, along with the multi-model ensemble mean and the inter-model variability (one standard deviation; SD).

| Model             | piClim-aer |       |       |       | piClim-SO <sub>2</sub> |       |       |       | piClim-OC |       |       |       | piClim-BC |      |       |      |
|-------------------|------------|-------|-------|-------|------------------------|-------|-------|-------|-----------|-------|-------|-------|-----------|------|-------|------|
|                   | ERF        | ARI   | ACI   | ALB   | ERF                    | ARI   | ACI   | ALB   | ERF       | ARI   | ACI   | ALB   | ERF       | ARI  | ACI   | ALB  |
| CNRM-ESM2-1       | -0.82      | -0.22 | -0.59 | -0.01 | -0.84                  | -0.29 | -0.55 | 0.01  | -0.23     | -0.07 | -0.18 | 0.02  | 0.15      | 0.13 | -0.01 | 0.02 |
| EC-Earth3-AerChem | -1.36      | 0.08  | -1.36 | -0.08 | -                      | -     | -     | -     | -         | -     | -     | -     | -         | -    | -     | -    |
| GFDL-ESM4         | -0.59      | 0.24  | -0.77 | -0.06 | -0.76                  | -0.22 | -0.51 | -0.02 | -0.21     | -0.09 | -0.13 | 0.01  | 0.62      | 0.51 | 0.08  | 0.03 |
| MPI-ESM-1-2-HAM   | -1.53      | 0.19  | -1.67 | -0.05 | -1.35                  | -0.20 | -1.10 | -0.05 | -0.85     | -0.04 | -0.80 | 0.00  | 0.04      | 0.71 | -0.71 | 0.04 |
| MRI-ESM2-0        | -2.76      | -0.32 | -2.49 | 0.05  | -1.92                  | -0.49 | -1.38 | -0.05 | -0.52     | -0.07 | -0.43 | -0.02 | -1.22     | 0.26 | -1.63 | 0.15 |
| NorESM2-LM        | -1.63      | 0.00  | -1.55 | -0.08 | -1.80                  | -0.22 | -1.40 | -0.18 | -0.35     | -0.08 | -0.27 | 0.00  | 0.46      | 0.32 | 0.02  | 0.12 |
| UKESM1-0-LL       | -1.26      | -0.20 | -1.00 | -0.06 | -1.68                  | -0.53 | -1.08 | -0.07 | -0.25     | -0.16 | -0.07 | -0.03 | 0.51      | 0.36 | 0.15  | 0.00 |
| ENSEMBLE (Mean)   | -1.42      | -0.03 | -1.35 | -0.04 | -1.39                  | -0.33 | -1.01 | -0.06 | -0.40     | -0.09 | -0.31 | 0.00  | 0.09      | 0.38 | -0.35 | 0.06 |
| ENSEMBLE (SD)     | 0.65       | 0.20  | 0.59  | 0.04  | 0.45                   | 0.13  | 0.36  | 0.06  | 0.22      | 0.04  | 0.25  | 0.01  | 0.62      | 0.19 | 0.64  | 0.06 |

**Table S3.** As in Table S1, but for the global mean LW ERF values.

| Model             | piClim-aer |       |       |      | piClim-SO <sub>2</sub> |       |      |      | piClim-OC |      |       |       | piClim-BC |      |       |       |
|-------------------|------------|-------|-------|------|------------------------|-------|------|------|-----------|------|-------|-------|-----------|------|-------|-------|
|                   | ERF        | ARI   | ACI   | ALB  | ERF                    | ARI   | ACI  | ALB  | ERF       | ARI  | ACI   | ALB   | ERF       | ARI  | ACI   | ALB   |
| CNRM-ESM2-1       | 0.08       | 0.00  | -0.02 | 0.09 | 0.10                   | 0.00  | 0.02 | 0.07 | 0.06      | 0.00 | 0.04  | 0.03  | -0.03     | 0.00 | -0.02 | -0.01 |
| EC-Earth3-AerChem | 0.01       | 0.03  | -0.17 | 0.15 | -                      | -     | -    | -    | -         | -    | -     | -     | -         | -    | -     | -     |
| GFDL-ESM4         | -0.11      | 0.02  | -0.15 | 0.02 | 0.08                   | 0.01  | 0.00 | 0.08 | 0.00      | 0.00 | -0.04 | 0.04  | -0.27     | 0.01 | -0.18 | -0.11 |
| MPI-ESM-1-2-HAM   | 0.27       | -0.03 | 0.10  | 0.19 | 0.28                   | -0.04 | 0.14 | 0.19 | 0.06      | 0.02 | 0.02  | 0.02  | -0.19     | 0.01 | -0.16 | -0.04 |
| MRI-ESM2-0        | 1.52       | 0.00  | 1.49  | 0.03 | 0.52                   | 0.00  | 0.42 | 0.09 | 0.18      | 0.00 | 0.21  | -0.03 | 1.45      | 0.00 | 1.54  | -0.08 |
| NorESM2-LM        | 0.22       | 0.04  | 0.17  | 0.02 | 0.35                   | 0.03  | 0.29 | 0.03 | -0.02     | 0.00 | 0.00  | -0.03 | -0.22     | 0.00 | -0.13 | -0.10 |
| UKESM1-0-LL       | 0.16       | 0.05  | 0.01  | 0.11 | 0.32                   | 0.04  | 0.18 | 0.10 | 0.04      | 0.00 | 0.01  | 0.03  | -0.15     | 0.01 | -0.16 | 0.01  |
| ENSEMBLE (Mean)   | 0.31       | 0.02  | 0.21  | 0.09 | 0.28                   | 0.01  | 0.18 | 0.09 | 0.05      | 0.00 | 0.04  | 0.01  | 0.10      | 0.00 | 0.15  | -0.06 |
| ENSEMBLE (SD)     | 0.51       | 0.02  | 0.54  | 0.06 | 0.15                   | 0.03  | 0.15 | 0.05 | 0.07      | 0.01 | 0.08  | 0.03  | 0.61      | 0.01 | 0.62  | 0.04  |

**Table S4.** Global mean SW and LW ERF values (in  $W\ m^{-2}$ ) for the transient (histSST) experiment averaged over the 1995-2014 period.  $ERF_{TOTAL}$ ,  $ERF_{ARI}$ ,  $ERF_{ACI}$  and  $ERF_{ALB}$  are presented for each ESM, along with the multi-model ensemble mean and the inter-model variability (one standard deviation; SD).

| Model             | SW    |       |       |       | LW    |       |       |      |
|-------------------|-------|-------|-------|-------|-------|-------|-------|------|
|                   | ERF   | ARI   | ACI   | ALB   | ERF   | ARI   | ACI   | ALB  |
| CNRM-ESM2-1       | -0.85 | -0.26 | -0.53 | -0.05 | -0.01 | 0.00  | -0.06 | 0.04 |
| EC-Earth3-AerChem | -1.85 | -0.01 | -1.78 | -0.06 | 0.15  | 0.03  | -0.08 | 0.20 |
| GFDL-ESM4         | -0.80 | 0.05  | -0.79 | -0.06 | 0.01  | 0.02  | -0.08 | 0.08 |
| MPI-ESM-1-2-HAM   | -1.60 | 0.10  | -1.64 | -0.05 | 0.27  | -0.02 | 0.13  | 0.16 |
| NorESM2-LM        | -2.03 | -0.09 | -1.76 | -0.17 | 0.28  | 0.04  | 0.17  | 0.08 |
| UKESM1-0-LL       | -1.52 | -0.31 | -1.12 | -0.09 | 0.24  | 0.04  | 0.03  | 0.17 |
| ENSEMBLE (Mean)   | -1.43 | -0.10 | -1.25 | -0.08 | 0.15  | 0.02  | 0.01  | 0.12 |
| ENSEMBLE (SD)     | 0.47  | 0.15  | 0.49  | 0.04  | 0.12  | 0.02  | 0.10  | 0.06 |

**Table S5.** Mean AOD changes for histSST experiment averaged over 1965-1984 and 1995-2014. Variables od550aer, od550so4, od550oa, and od550bc denote the differences in all-aerosol, sulphate, organic aerosol, and black carbon AOD, respectively. Global and regional AOD changes for five regions of interest (ENA: East North America, WCE: West and Central Europe, MED: Mediterranean, EAS: East Asia, SAS: South Asia) are presented for each model, along with the multi-model ensemble mean and the inter-model variability (SD: one standard deviation).

| Model             | Region | 1965-1984 |          |         |         | 1995-2014 |          |         |         |
|-------------------|--------|-----------|----------|---------|---------|-----------|----------|---------|---------|
|                   |        | od550aer  | od550so4 | od550oa | od550bc | od550aer  | od550so4 | od550oa | od550bc |
| CNRM-ESM2-1       | ENA    | 0.0916    | 0.0935   | -0.0029 | 0.0014  | 0.0520    | 0.0543   | -0.0042 | 0.0009  |
|                   | WCE    | 0.1079    | 0.1014   | 0.0028  | 0.0042  | 0.0369    | 0.0351   | -0.0009 | 0.0018  |
|                   | MED    | 0.0580    | 0.0526   | 0.0019  | 0.0018  | 0.0369    | 0.0329   | 0.0025  | 0.0022  |
|                   | EAS    | 0.0639    | 0.0511   | 0.0072  | 0.0053  | 0.1547    | 0.1212   | 0.0211  | 0.0127  |
|                   | SAS    | 0.0415    | 0.0278   | 0.0085  | 0.0046  | 0.1190    | 0.0896   | 0.0219  | 0.0108  |
|                   | GLOBAL | 0.0132    | 0.0117   | 0.0011  | 0.0007  | 0.0166    | 0.0127   | 0.0027  | 0.0013  |
| EC-Earth3-AerChem | ENA    | 0.1370    | 0.1084   | 0.0187  | 0.0022  | 0.0905    | 0.0644   | 0.0150  | 0.0018  |
|                   | WCE    | 0.1665    | 0.1218   | 0.0176  | 0.0045  | 0.0749    | 0.0482   | 0.0091  | 0.0022  |
|                   | MED    | 0.0975    | 0.0754   | 0.0099  | 0.0022  | 0.0607    | 0.0455   | 0.0109  | 0.0024  |
|                   | EAS    | 0.1216    | 0.0604   | 0.0290  | 0.0051  | 0.2866    | 0.1579   | 0.0724  | 0.0133  |
|                   | SAS    | 0.0746    | 0.0399   | 0.0267  | 0.0037  | 0.2098    | 0.1198   | 0.0714  | 0.0101  |
|                   | GLOBAL | 0.0290    | 0.0192   | 0.0068  | 0.0009  | 0.0380    | 0.0225   | 0.0129  | 0.0016  |
| GFDL-ESM4         | ENA    | 0.1134    | 0.1103   | -0.0036 | 0.0030  | 0.0855    | 0.0753   | -0.0044 | 0.0026  |
|                   | WCE    | 0.3129    | 0.2967   | 0.0041  | 0.0077  | 0.1157    | 0.0964   | -0.0009 | 0.0038  |
|                   | MED    | 0.0916    | 0.0906   | 0.0025  | 0.0033  | 0.0648    | 0.0579   | 0.0036  | 0.0038  |
|                   | EAS    | 0.1323    | 0.1022   | 0.0103  | 0.0090  | 0.3343    | 0.2543   | 0.0305  | 0.0220  |
|                   | SAS    | 0.0596    | 0.0423   | 0.0119  | 0.0057  | 0.2433    | 0.1439   | 0.0318  | 0.0135  |
|                   | GLOBAL | 0.0290    | 0.0269   | 0.0019  | 0.0015  | 0.0411    | 0.0301   | 0.0049  | 0.0027  |
| MPI-ESM1-2-HAM    | ENA    | 0.2016    |          |         |         | 0.0908    |          |         |         |
|                   | WCE    | 0.4352    |          |         |         | 0.1107    |          |         |         |
|                   | MED    | 0.1309    | -        | -       | -       | 0.0768    | -        | -       | -       |
|                   | EAS    | 0.1502    |          |         |         | 0.3783    |          |         |         |
|                   | SAS    | 0.0416    |          |         |         | 0.1304    |          |         |         |
|                   | GLOBAL | 0.0244    |          |         |         | 0.0255    |          |         |         |
| NorESM2-LM        | ENA    | 0.0707    | 0.0545   | 0.0115  | 0.0021  | 0.0380    | 0.0298   | 0.0052  | 0.0017  |
|                   | WCE    | 0.1031    | 0.0714   | 0.0194  | 0.0041  | 0.0377    | 0.0240   | 0.0072  | 0.0021  |
|                   | MED    | 0.0688    | 0.0416   | 0.0083  | 0.0023  | 0.0404    | 0.0239   | 0.0069  | 0.0028  |
|                   | EAS    | 0.0600    | 0.0303   | 0.0209  | 0.0054  | 0.1593    | 0.0786   | 0.0638  | 0.0133  |
|                   | SAS    | 0.0383    | 0.0216   | 0.0147  | 0.0039  | 0.1169    | 0.0618   | 0.0469  | 0.0098  |
|                   | GLOBAL | 0.0166    | 0.0097   | 0.0045  | 0.0009  | 0.0239    | 0.0110   | 0.0089  | 0.0016  |
| UKESM1-0-LL       | ENA    | 0.1422    |          |         |         | 0.0805    |          |         |         |
|                   | WCE    | 0.2273    |          |         |         | 0.0751    |          |         |         |
|                   | MED    | 0.1198    | -        | -       | -       | 0.0786    | -        | -       | -       |
|                   | EAS    | 0.0925    |          |         |         | 0.2319    |          |         |         |
|                   | SAS    | 0.0497    |          |         |         | 0.1972    |          |         |         |
|                   | GLOBAL | 0.0300    |          |         |         | 0.0363    |          |         |         |
| ENSEMBLE (Mean)   | ENA    | 0.1261    | 0.0917   | 0.0059  | 0.0022  | 0.0729    | 0.0560   | 0.0029  | 0.0017  |
|                   | WCE    | 0.2255    | 0.1478   | 0.0110  | 0.0051  | 0.0752    | 0.0509   | 0.0036  | 0.0025  |
|                   | MED    | 0.0944    | 0.0650   | 0.0057  | 0.0024  | 0.0597    | 0.0400   | 0.0060  | 0.0028  |
|                   | EAS    | 0.1034    | 0.0610   | 0.0169  | 0.0062  | 0.2575    | 0.1530   | 0.0469  | 0.0153  |
|                   | SAS    | 0.0509    | 0.0329   | 0.0154  | 0.0045  | 0.1694    | 0.1038   | 0.0430  | 0.0111  |
|                   | GLOBAL | 0.0237    | 0.0169   | 0.0036  | 0.0010  | 0.0302    | 0.0191   | 0.0073  | 0.0018  |
| ENSEMBLE (SD)     | ENA    | 0.0418    | 0.0224   | 0.0095  | 0.0006  | 0.0204    | 0.0168   | 0.0080  | 0.0006  |
|                   | WCE    | 0.1182    | 0.0878   | 0.0076  | 0.0015  | 0.0310    | 0.0276   | 0.0046  | 0.0008  |
|                   | MED    | 0.0258    | 0.0191   | 0.0035  | 0.0005  | 0.0162    | 0.0129   | 0.0033  | 0.0006  |
|                   | EAS    | 0.0340    | 0.0262   | 0.0086  | 0.0017  | 0.0839    | 0.0649   | 0.0216  | 0.0039  |
|                   | SAS    | 0.0127    | 0.0085   | 0.0069  | 0.0008  | 0.0495    | 0.0309   | 0.0187  | 0.0015  |
|                   | GLOBAL | 0.0065    | 0.0068   | 0.0023  | 0.0003  | 0.0088    | 0.0077   | 0.0039  | 0.0005  |

**Table S6.** Global mean total ERF values (in  $W m^{-2}$ ) for the transient (histSST) experiment averaged over the 2005-2014 period and the year 2014.  $ERF_{TOTAL}$ ,  $ERF_{ARI}$ ,  $ERF_{ACI}$  and  $ERF_{ALB}$  are presented for each ESM, along with the multi-model ensemble mean and the inter-model variability (one standard deviation; SD).

| Model             | 2005-2014 |       |       |       | 2014 (Jan-Dec) |       |       |       |
|-------------------|-----------|-------|-------|-------|----------------|-------|-------|-------|
|                   | ERF       | ARI   | ACI   | ALB   | ERF            | ARI   | ACI   | ALB   |
| CNRM-ESM2-1       | -0.92     | -0.25 | -0.59 | -0.07 | -1.12          | -0.26 | -0.72 | -0.15 |
| EC-Earth3-AerChem | -1.52     | 0.04  | -1.81 | 0.25  | -1.63          | 0.08  | -1.99 | 0.28  |
| GFDL-ESM4         | -0.69     | 0.10  | -0.82 | 0.03  | -0.47          | 0.11  | -0.78 | 0.20  |
| MPI-ESM-1-2-HAM   | -1.29     | 0.11  | -1.57 | 0.16  | 0.00           | 0.00  | 0.00  | 0.00  |
| NorESM2-LM        | -1.80     | -0.03 | -1.67 | -0.10 | -1.53          | 0.03  | -1.49 | -0.07 |
| UKESM1-0-LL       | -1.21     | -0.25 | -1.08 | 0.11  | -0.77          | -0.22 | -1.05 | 0.51  |
| ENSEMBLE (Mean)   | -1.23     | -0.06 | -1.22 | 0.06  | -1.10          | -0.05 | -1.21 | 0.16  |
| ENSEMBLE (SD)     | 0.36      | 0.15  | 0.45  | 0.12  | 0.44           | 0.16  | 0.48  | 0.24  |

# All Aerosols SW ERF (ENSEMBLE)

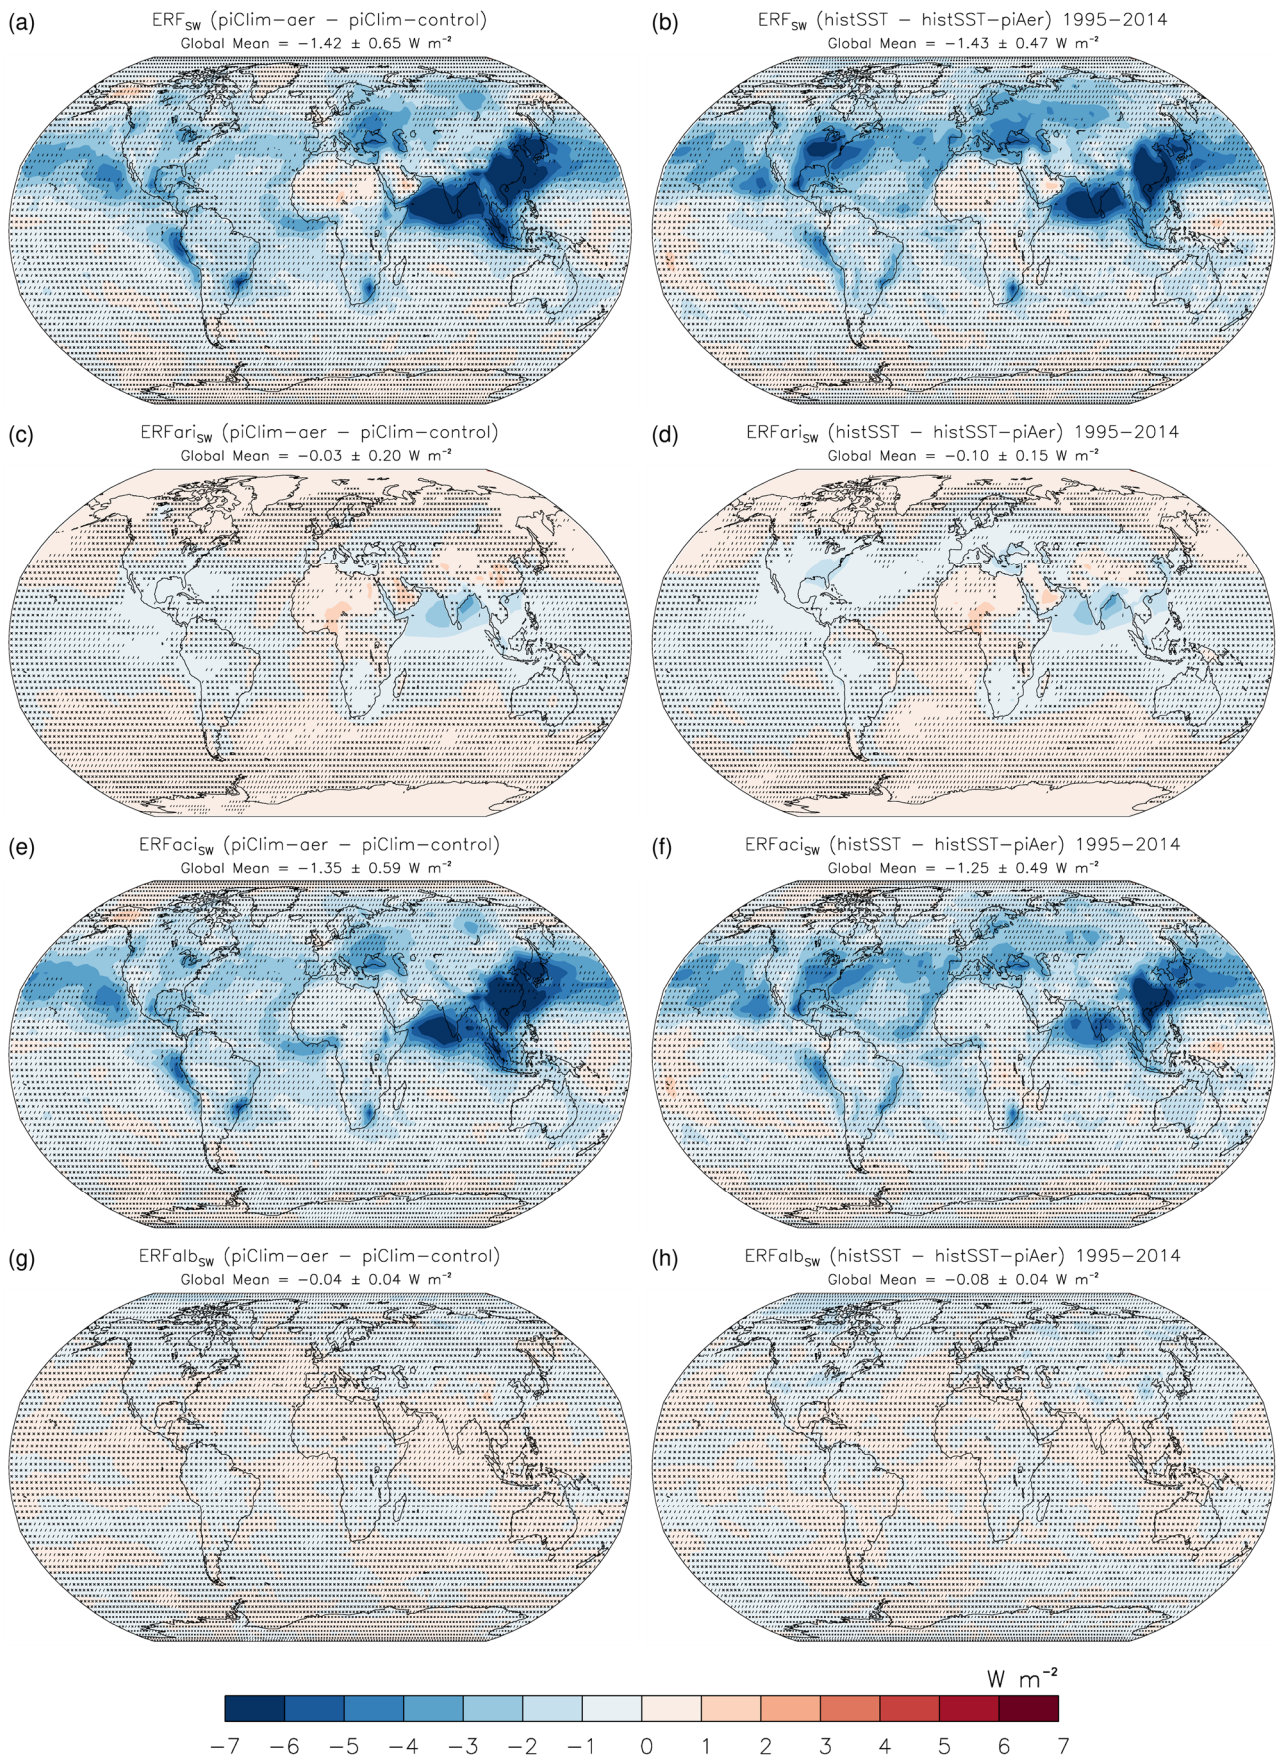

**Figure S1.** The SW ERF due to all anthropogenic aerosols relative to the pre-industrial era. The TOA spatial distribution is presented for the multi-model ensembles of piClim (left column) and histSST (averaged over 1995-2014; right column) experiments, respectively. The global mean SW ERF (1<sup>st</sup> row),  $ERF_{ARI}$  (2<sup>nd</sup> row),  $ERF_{ACI}$  (3<sup>rd</sup> row), and  $ERF_{ALB}$  (4<sup>th</sup> row) are shown along with the inter-model variability (one standard deviation). Colored areas devoid of markings indicate robust changes, while hatched (/) and cross-hatched (X) areas indicate non-robust changes and conflicting signals, respectively.

# All Aerosols LW ERF (ENSEMBLE)

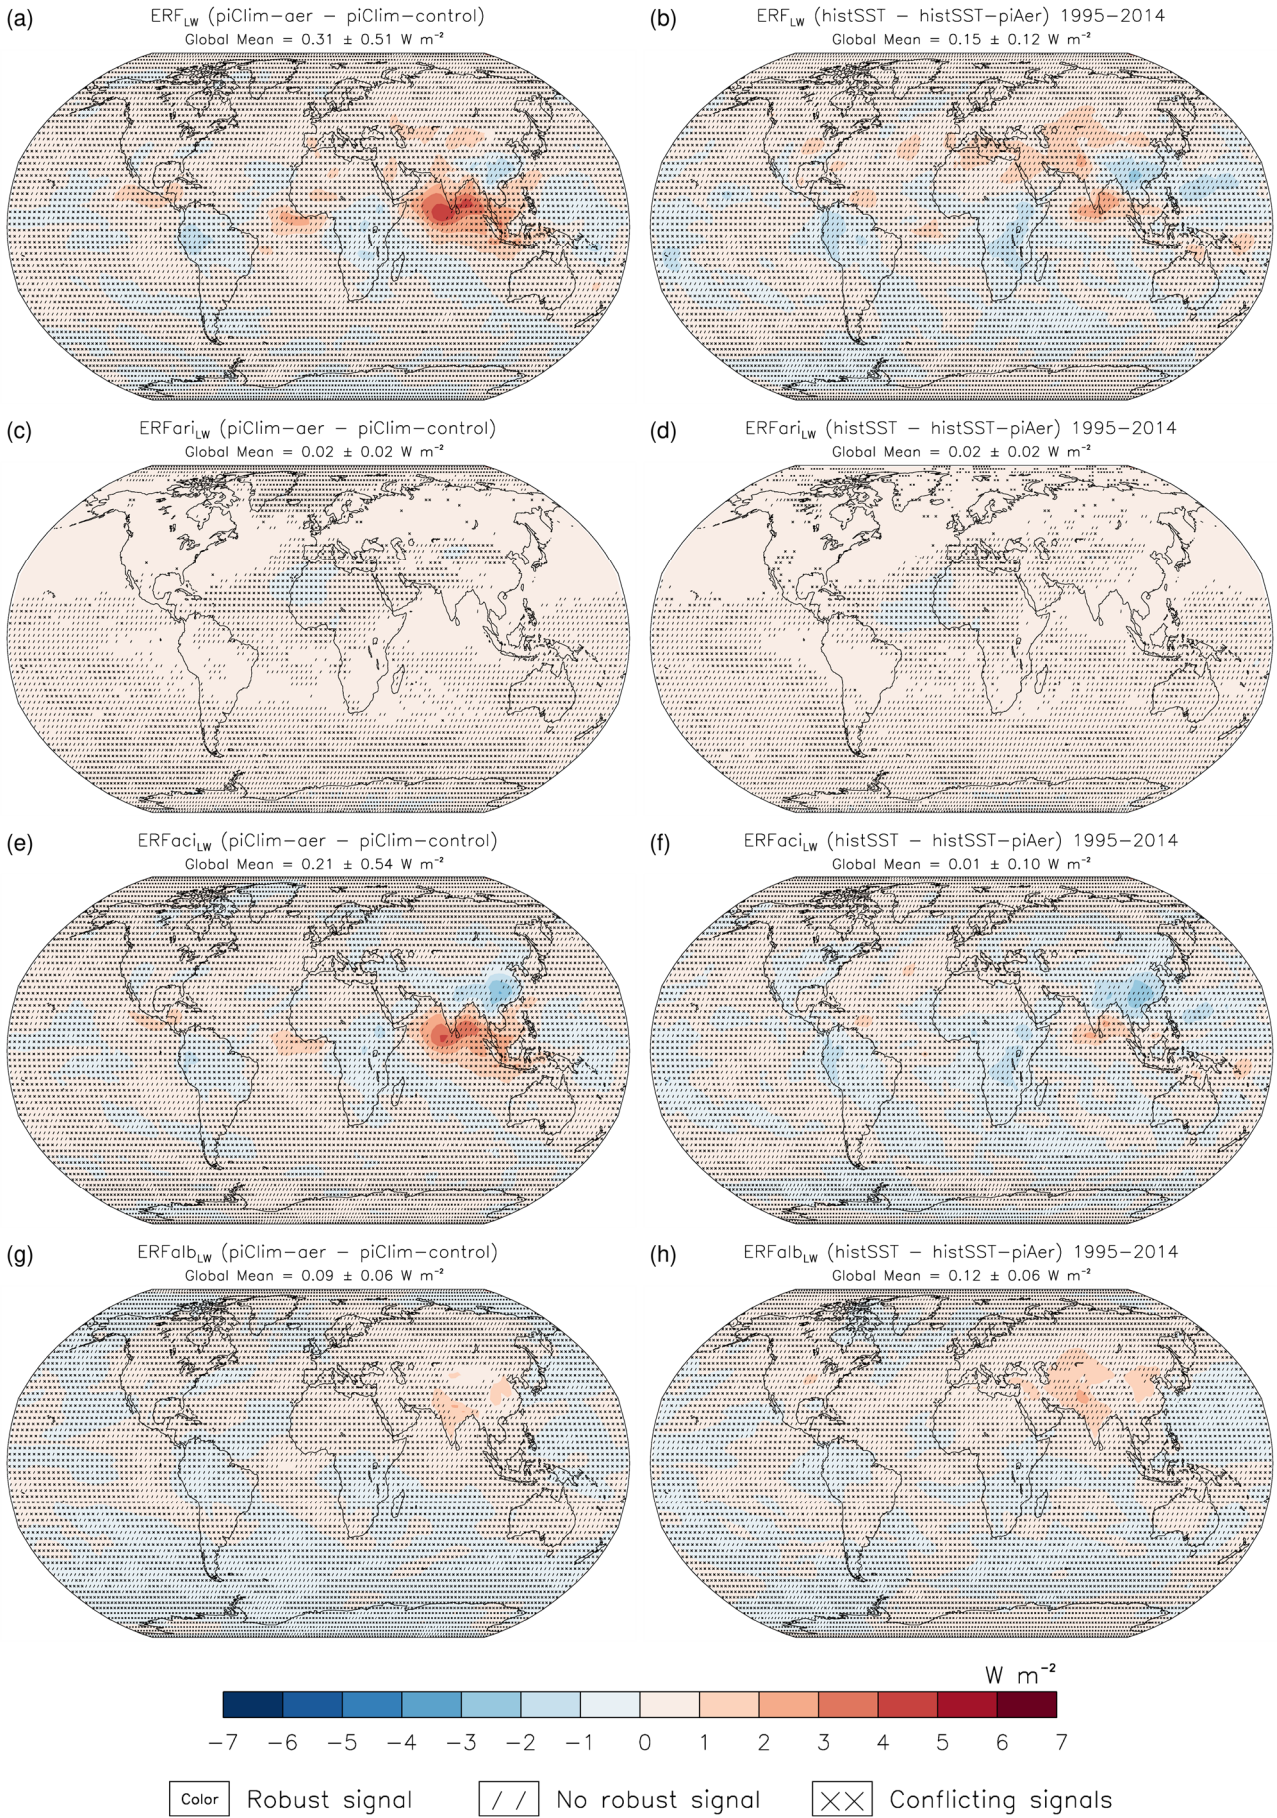

Figure S2. As in Figure S1, but for the LW.



### All Aerosols Total ERF (piClim-aer - piClim-control)

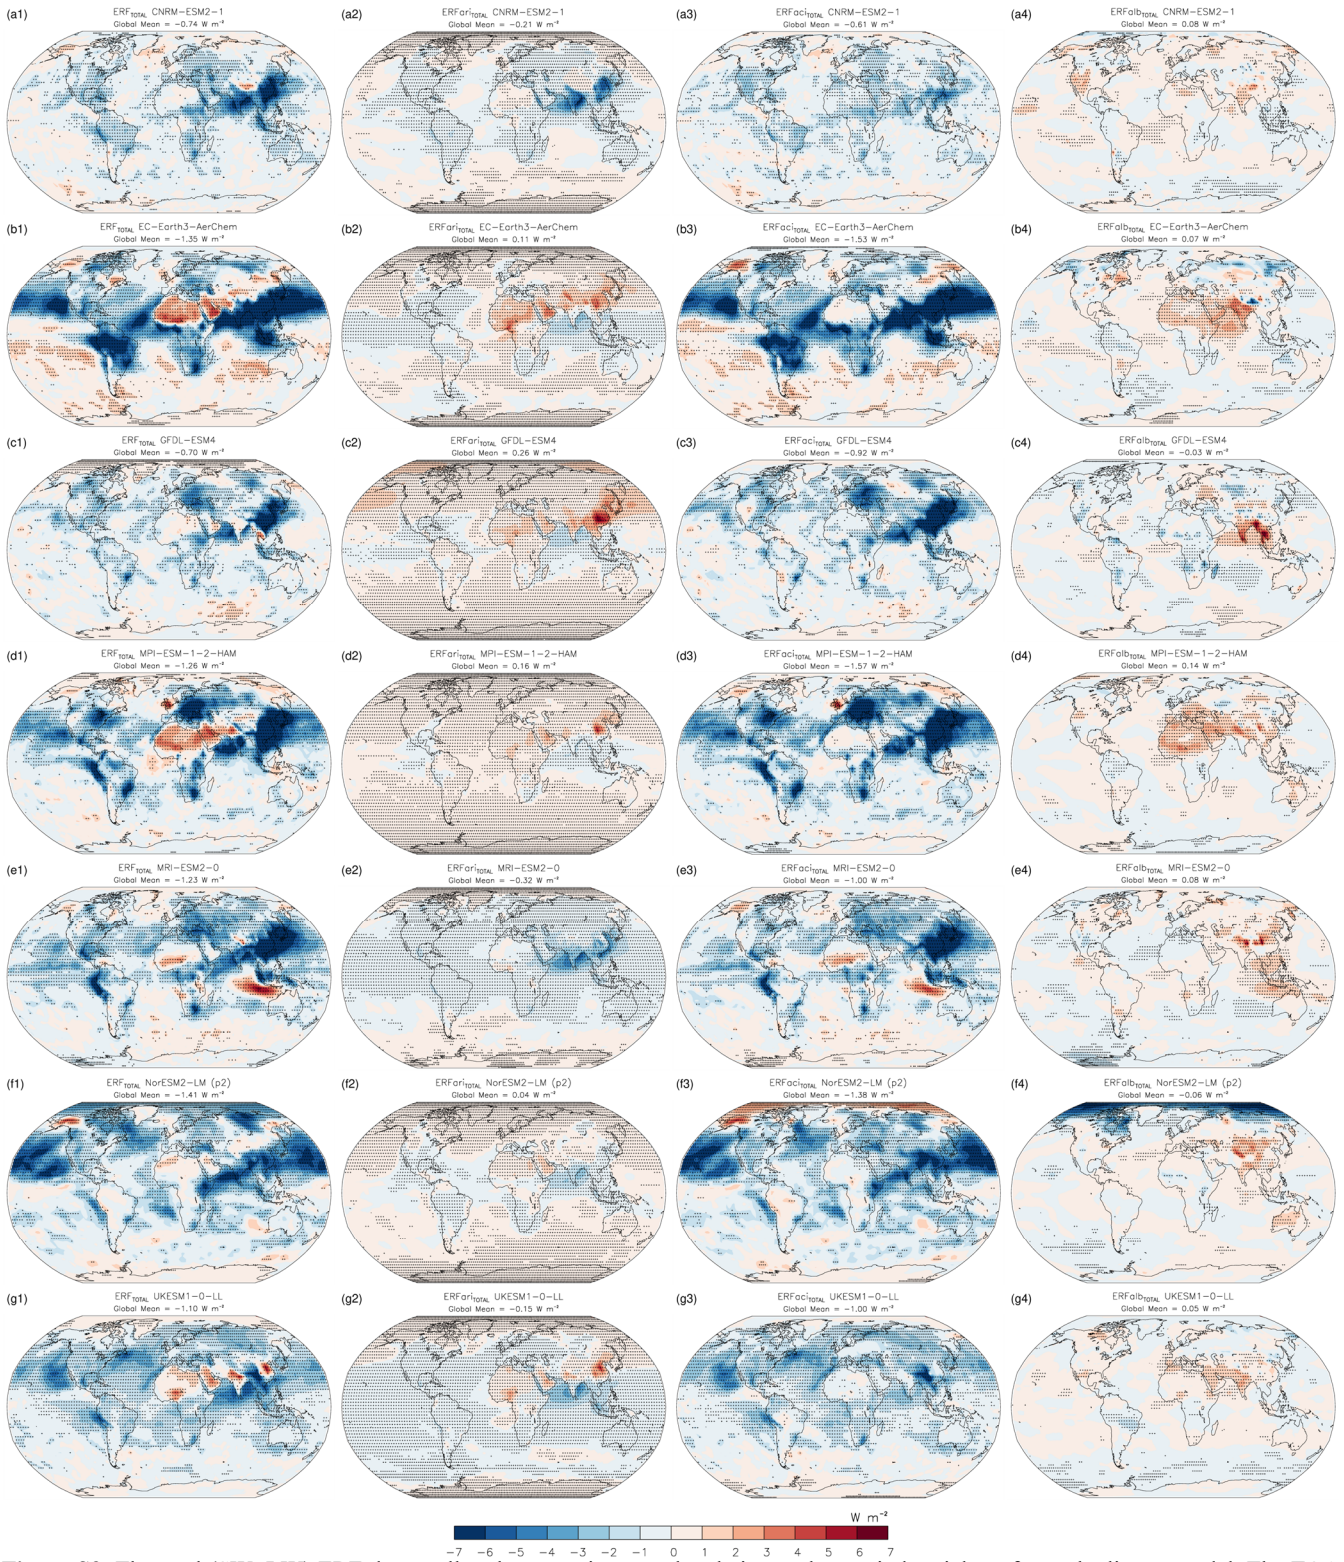

**Figure S3.** The total (SW+LW) ERF due to all anthropogenic aerosols relative to the pre-industrial era for each climate model. The TOA spatial distribution is presented only for the piClim-aer experiment. The global mean total ERF (1<sup>st</sup> column), ERF<sub>FARI</sub> (2<sup>nd</sup> column), ERF<sub>ACI</sub> (3<sup>rd</sup> column), and ERF<sub>ALB</sub> (4<sup>th</sup> column) are shown. Black crosses indicate statistically significant results.

All Aerosols Total ERF (histSST - histSST-piAer) 1995-2014

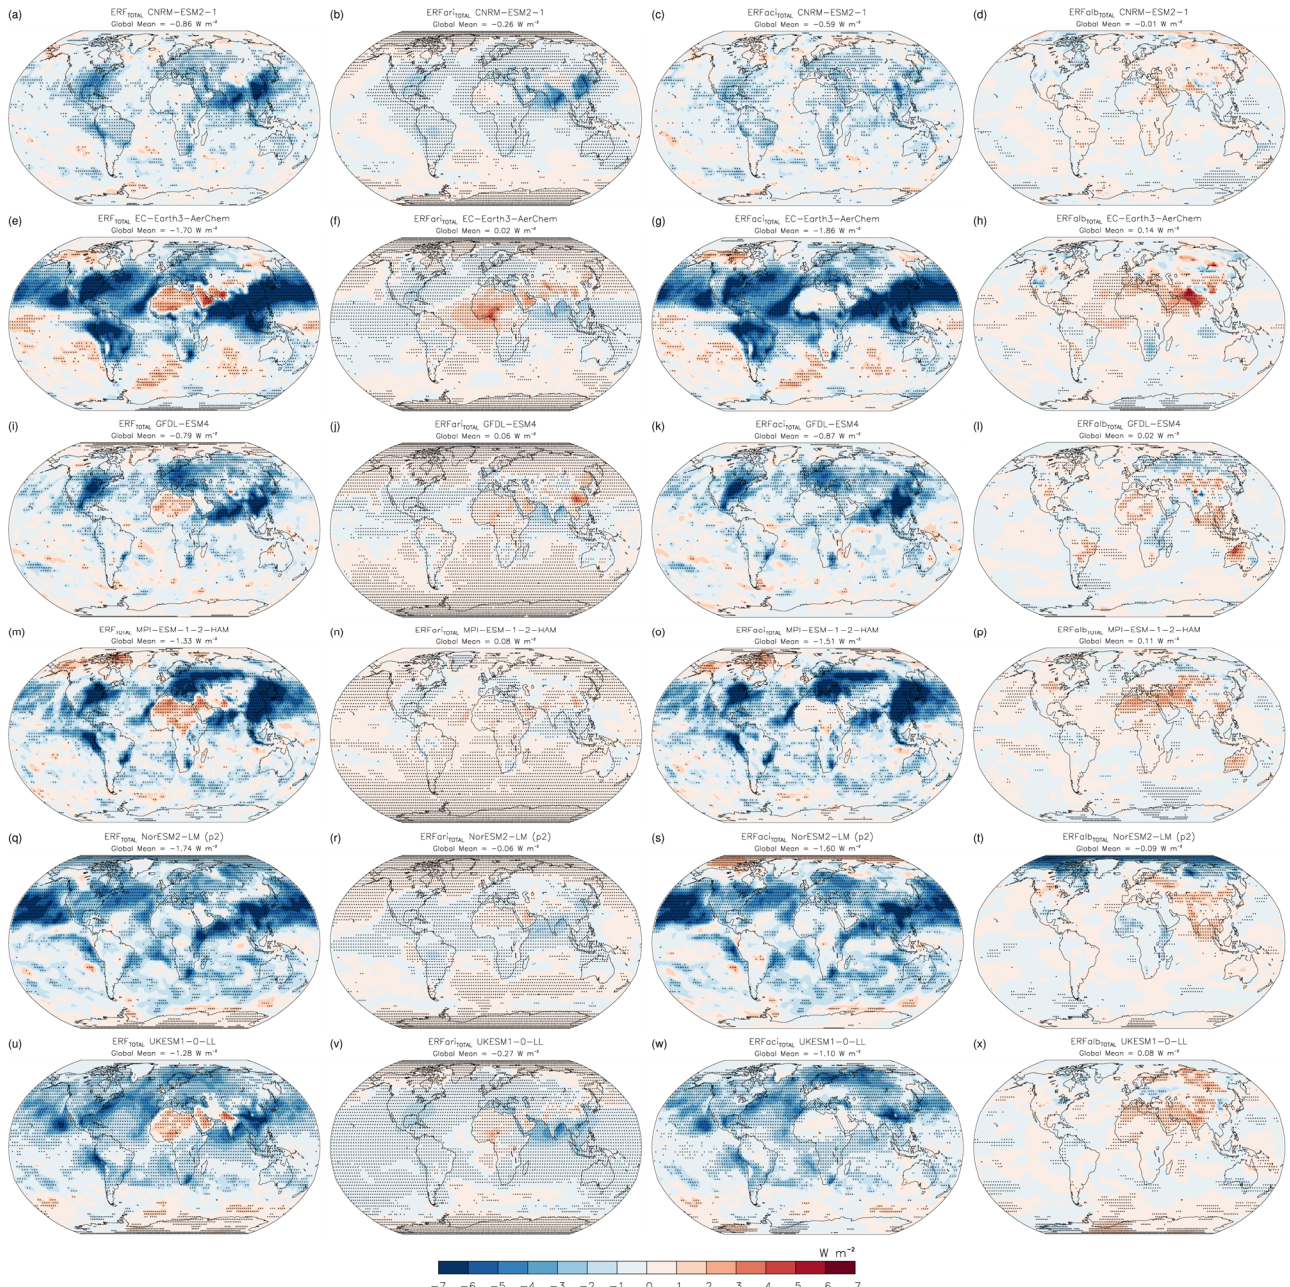

Figure S4. As in Fig. S3, but for the histSST experiment averaged over the 1995-2014 period.

## Anthropogenic Aerosols SW ERF (ENSEMBLE)

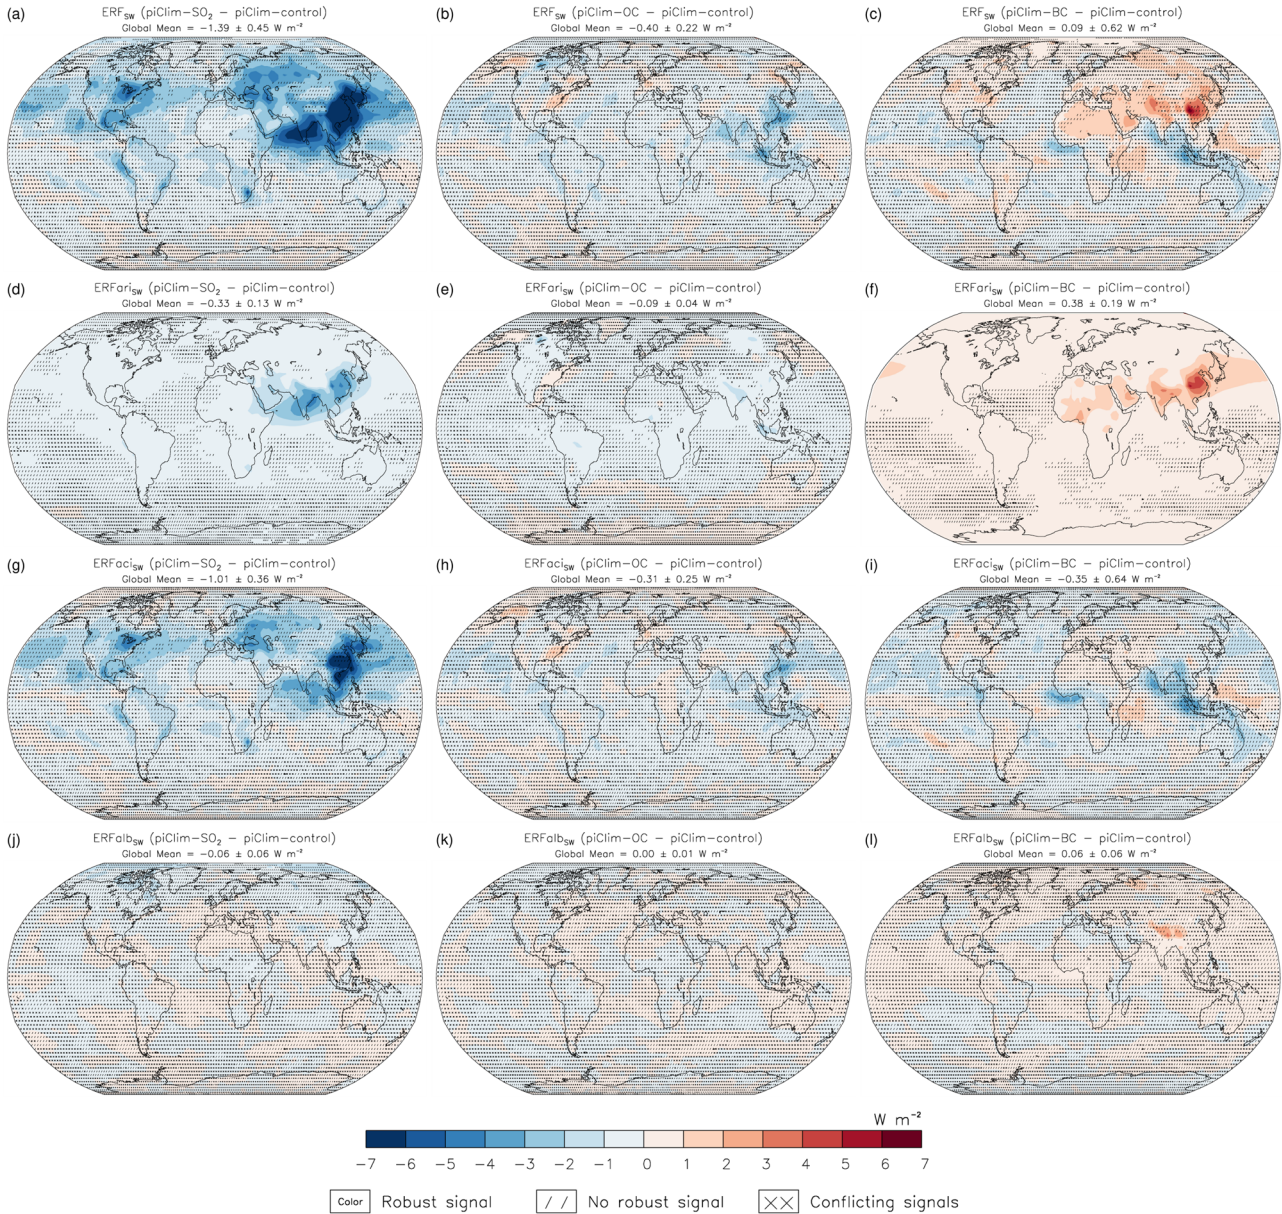

**Figure S5.** The SW ERF due to different anthropogenic aerosol subtype relative to the pre-industrial era. The TOA spatial distribution is presented for the multi-model ensembles piClim-SO<sub>2</sub> (left column), piClim-OC (middle column), and piClim-BC (right column) experiments, respectively. The global mean SW ERF (1<sup>st</sup> row), ERF<sub>ARI</sub> (2<sup>nd</sup> row), ERF<sub>ACI</sub> (3<sup>rd</sup> row), and ERF<sub>ALB</sub> (4<sup>th</sup> row) are shown along with the inter-model variability (one standard deviation). Colored areas devoid of markings indicate robust changes, while hatched (/) and cross-hatched (X) areas indicate non-robust changes and conflicting signals, respectively.

## Anthropogenic Aerosols LW ERF (ENSEMBLE)

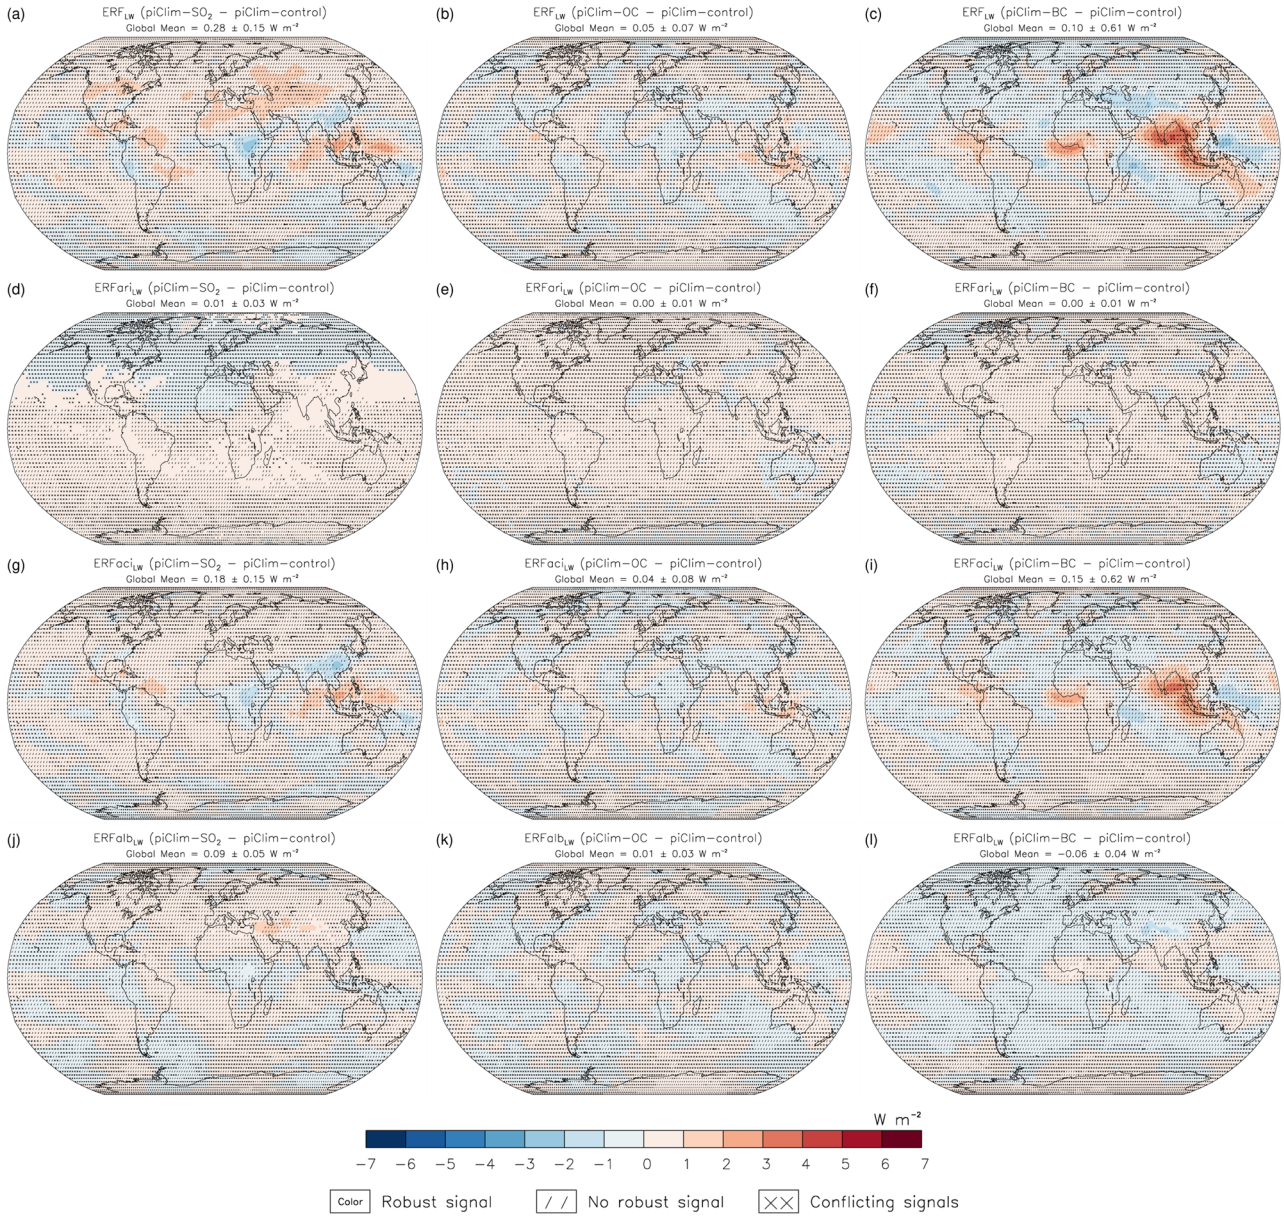

**Figure S6.** As in Figure S5, but for the LW ERFs.

### Sulphates Total ERF (piClim-SO<sub>2</sub> - piClim-control)

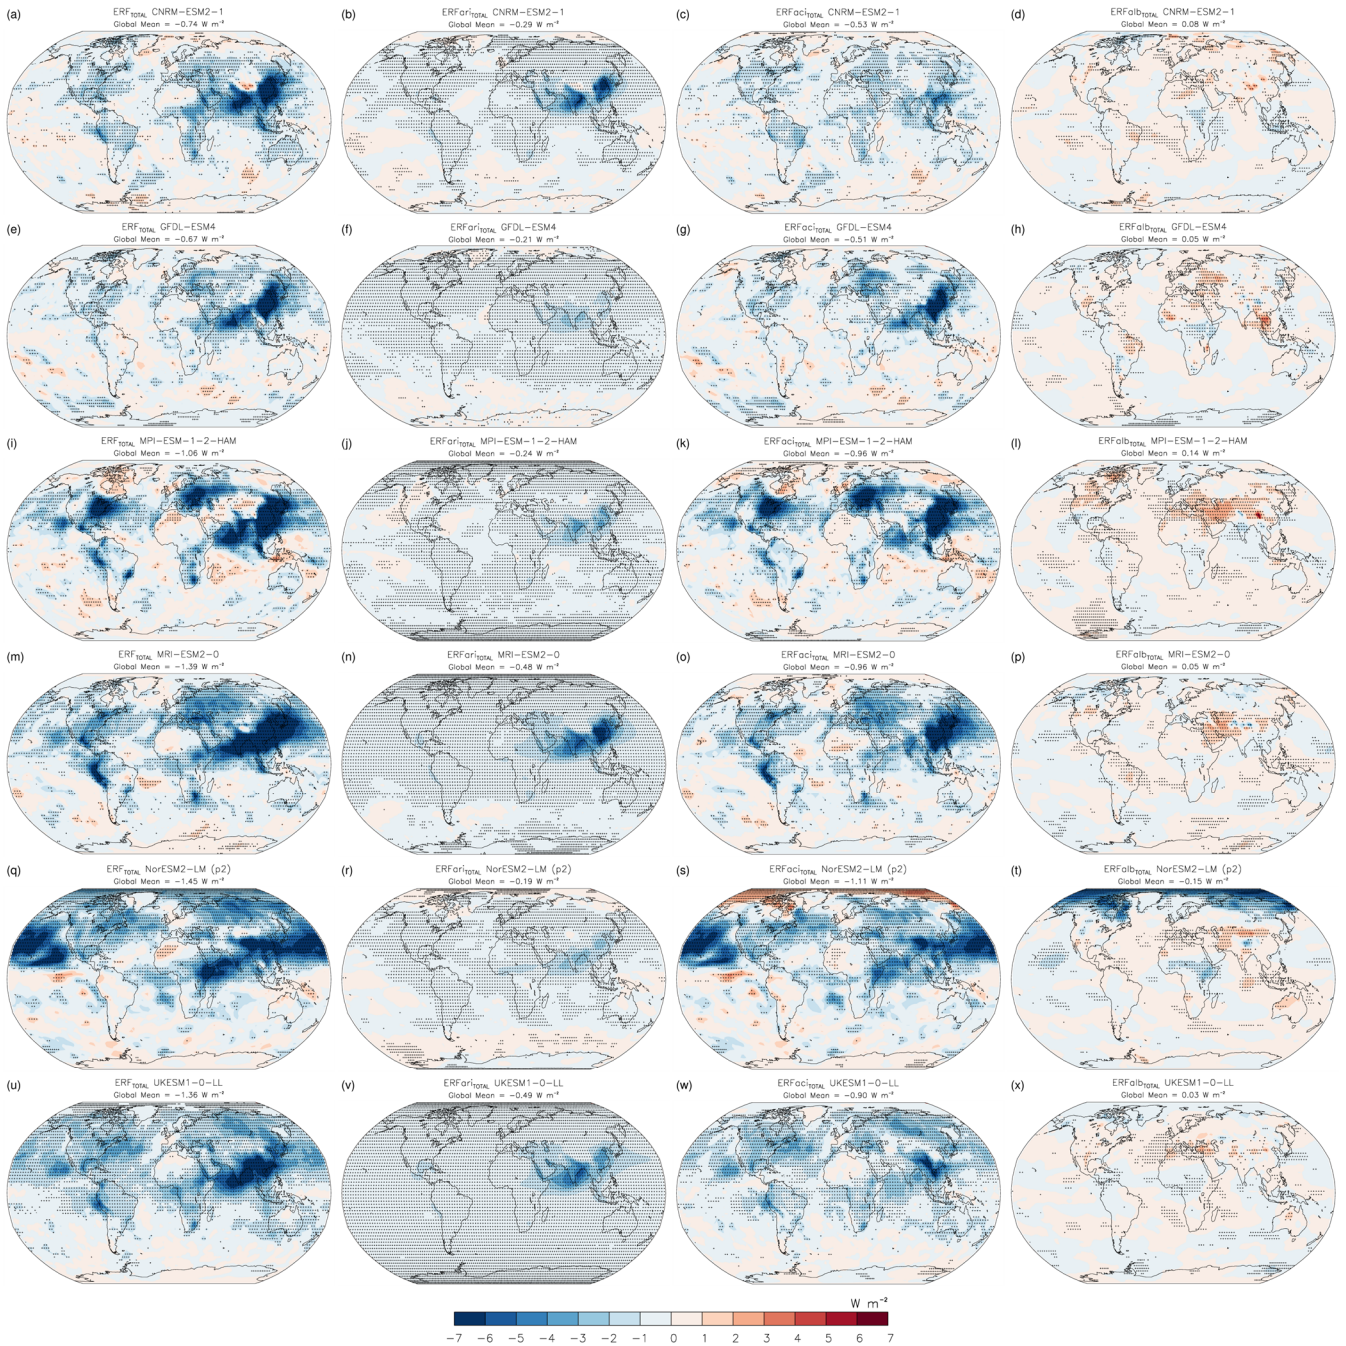

**Figure S7.** The total (SW+LW) ERF due to sulphate aerosols relative to the pre-industrial era for each climate model. The TOA spatial distribution is presented only for the piClim-SO<sub>2</sub> experiment. The global mean total ERF (1<sup>st</sup> column), ERF<sub>ARI</sub> (2<sup>nd</sup> column), ERF<sub>ACI</sub> (3<sup>rd</sup> column), and ERF<sub>ALB</sub> (4<sup>th</sup> column) are shown. Black crosses indicate statistically significant results.

## Organic Carbon Total ERF (piClim-OC - piClim-control)

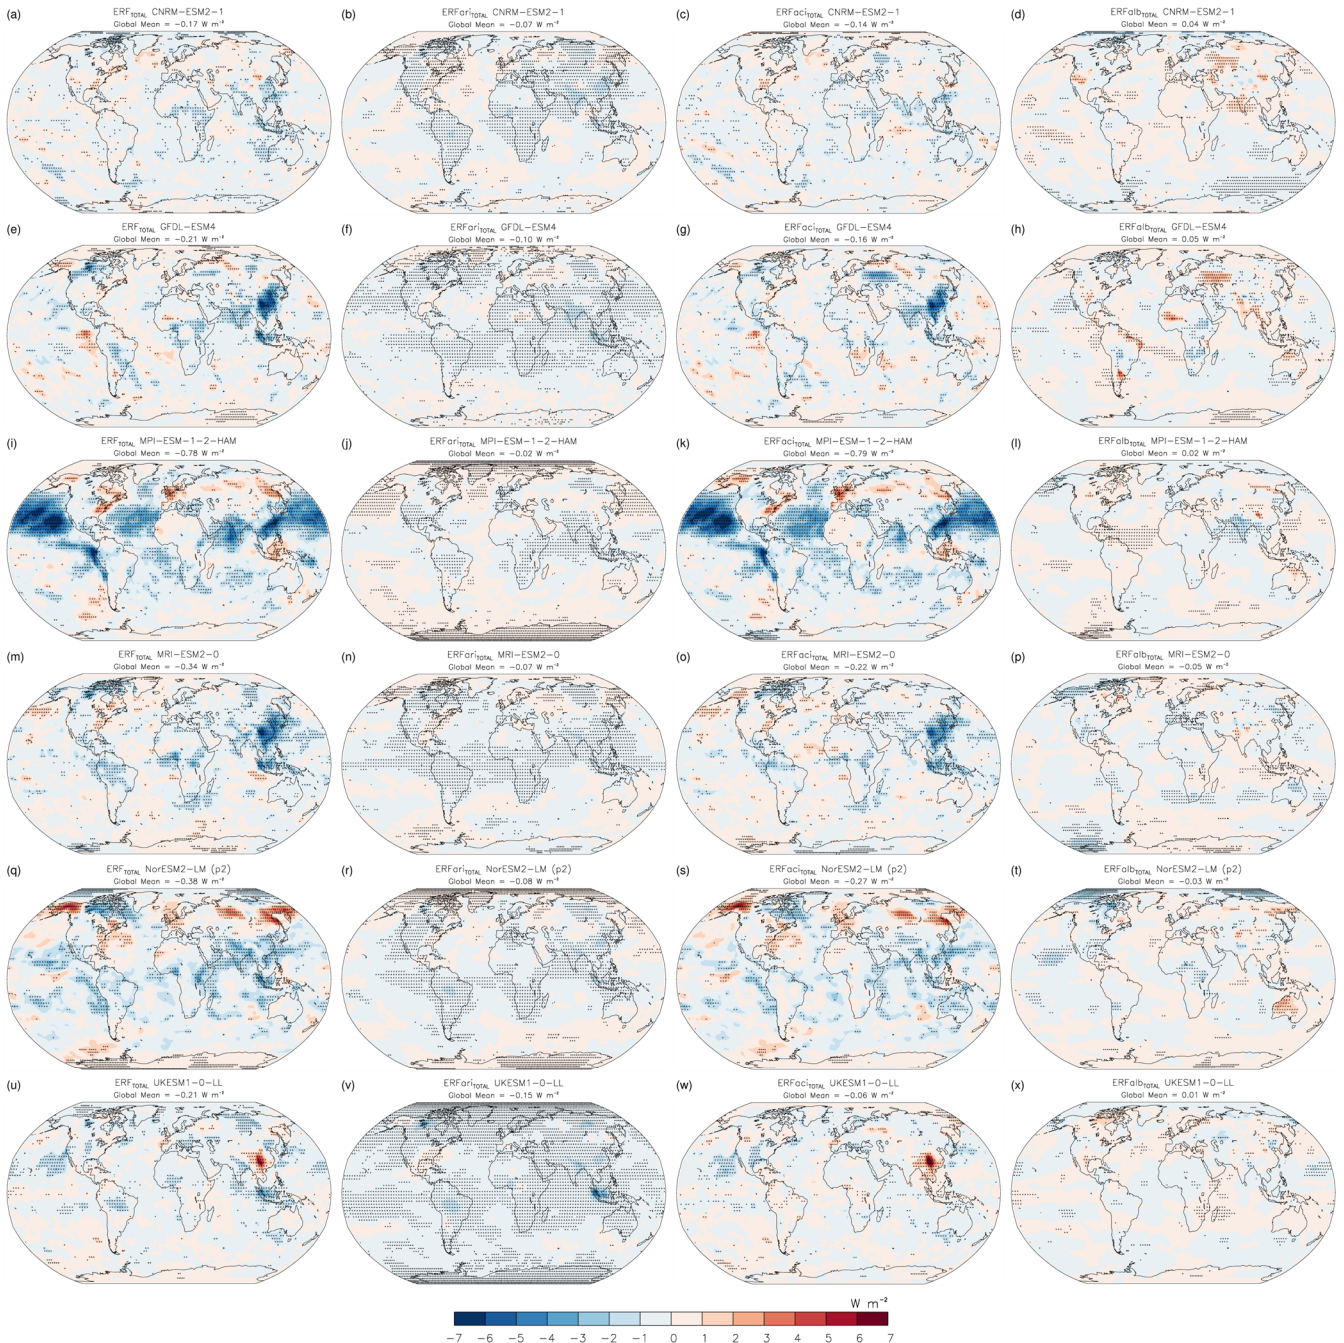

**Figure S8.** As in Fig. S7, but for piClim-OC.

## Black Carbon Total ERF (piClim-BC - piClim-control)

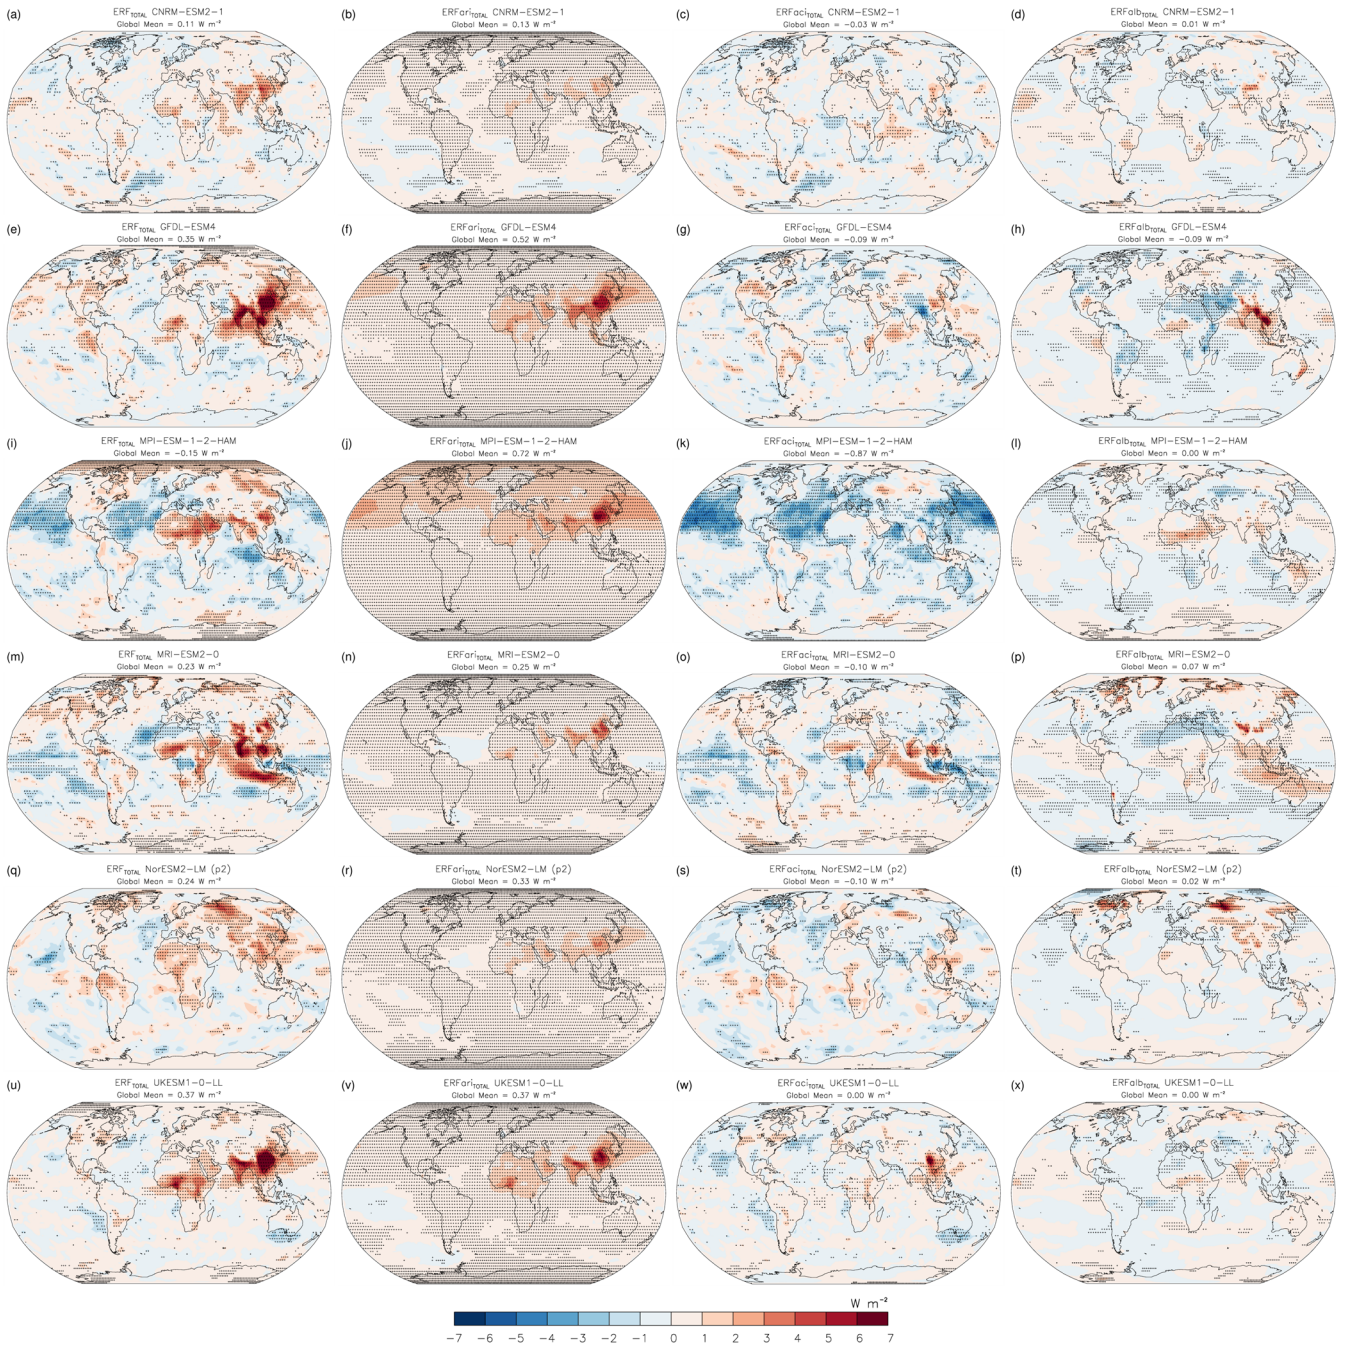

**Figure S9.** As in Fig. S7, but for piClim-BC.

### Relative Contribution of ERF Components (ENSEMBLE)

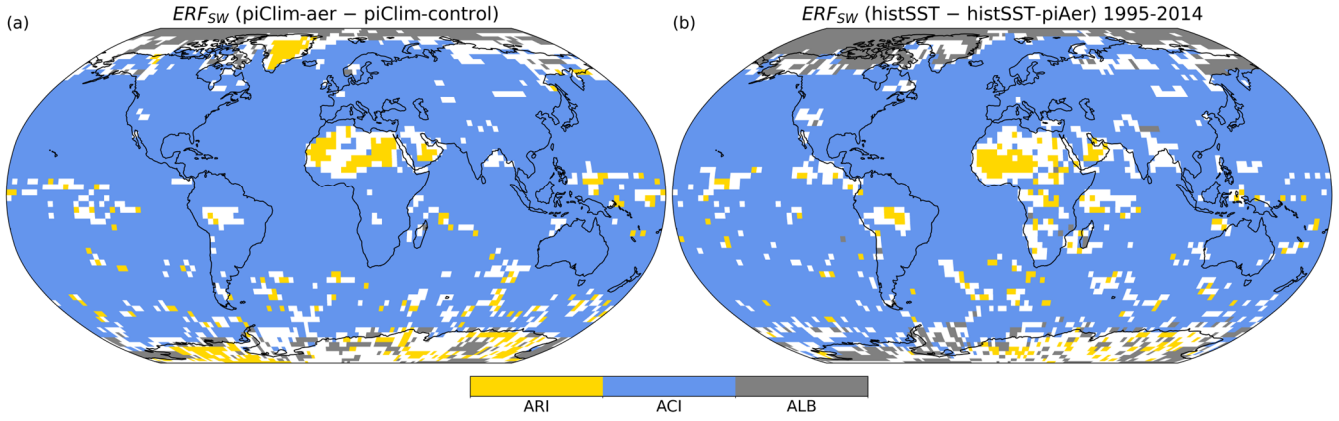

**Figure S10.** Areas where each of the three main ERF components ( $ERF_{ARI}$ ,  $ERF_{ACI}$ , and  $ERF_{ALB}$ ) dominates the overall SW ERF. The absolute values of SW  $ERF_{ARI}$ , SW  $ERF_{ACI}$ , and SW  $ERF_{ALB}$  are summed, and every grid cell is colored after the ERF component that contributes at least 50% to the resulting value, while each of the other two components contributes less than 33% to the resulting value. In cases where the above criterion is not met, the grid cell is colored white.

### Relative Contribution of ERF Components (ENSEMBLE)

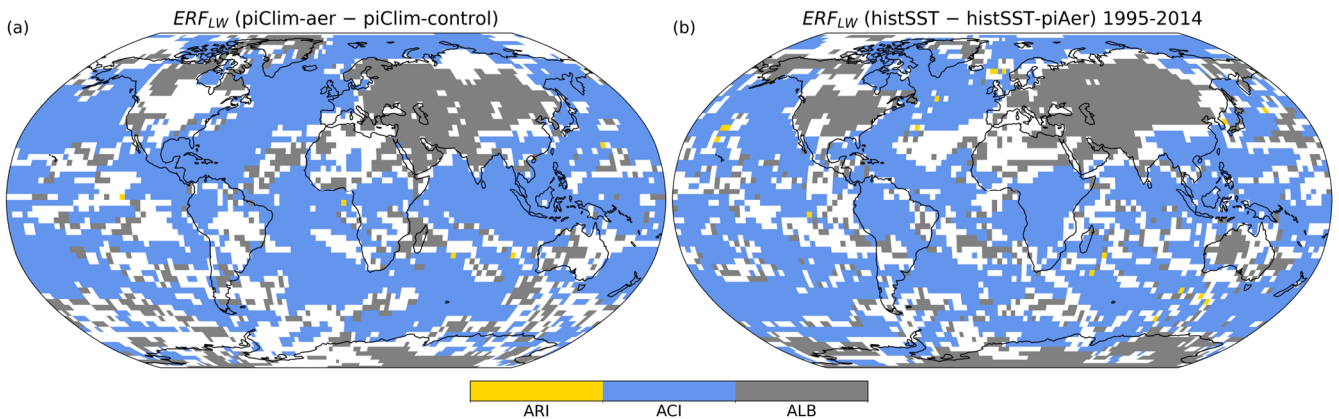

**Figure S11.** Areas where each of the three main ERF components ( $ERF_{ARI}$ ,  $ERF_{ACI}$ , and  $ERF_{ALB}$ ) dominates the overall LW ERF. The absolute values of LW  $ERF_{ARI}$ , LW  $ERF_{ACI}$ , and LW  $ERF_{ALB}$  are summed, and every grid cell is colored after the ERF component that contributes at least 50% to the resulting value, while each of the other two components contributes less than 33% to the resulting value. In cases where the above criterion is not met, the grid cell is colored white.



Relative Contribution of ERF Components (ENSEMBLE)

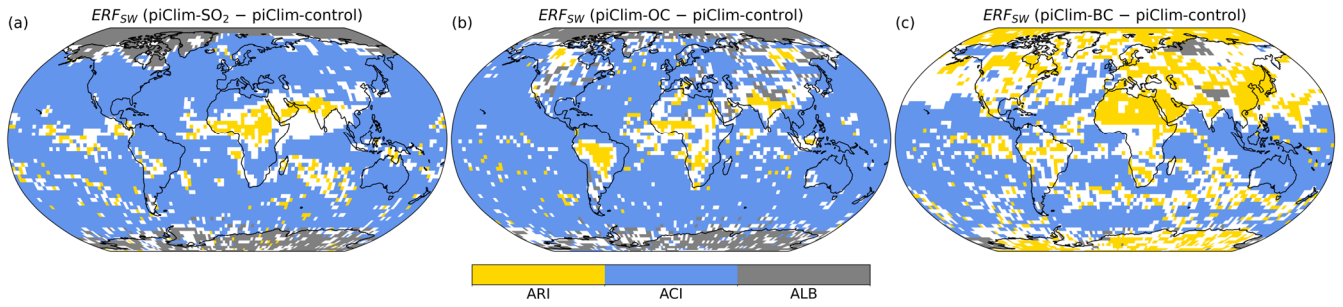

Figure S12. As in Fig.S10, but for piClim-SO<sub>2</sub> (left), piClim-OC (middle), and piClim-BC (right).

Relative Contribution of ERF Components (ENSEMBLE)

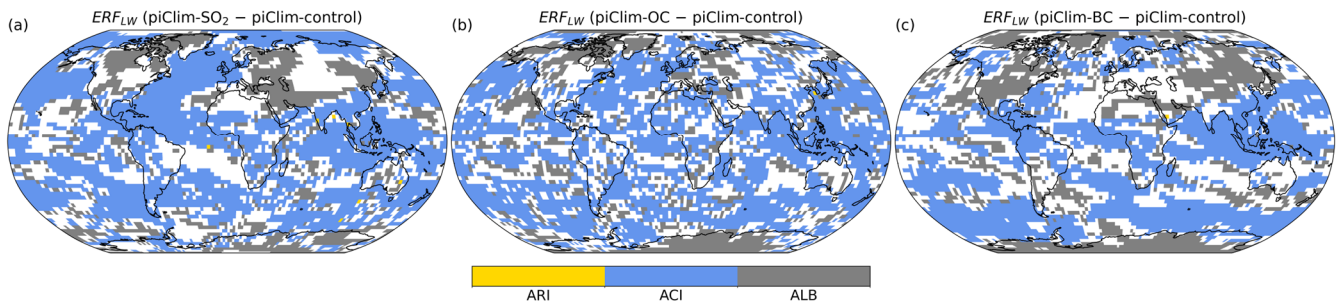

Figure S13. As in Fig.S11, but for piClim-SO<sub>2</sub> (left), piClim-OC (middle), and piClim-BC (right).

## Intermodel Variability of AOD changes

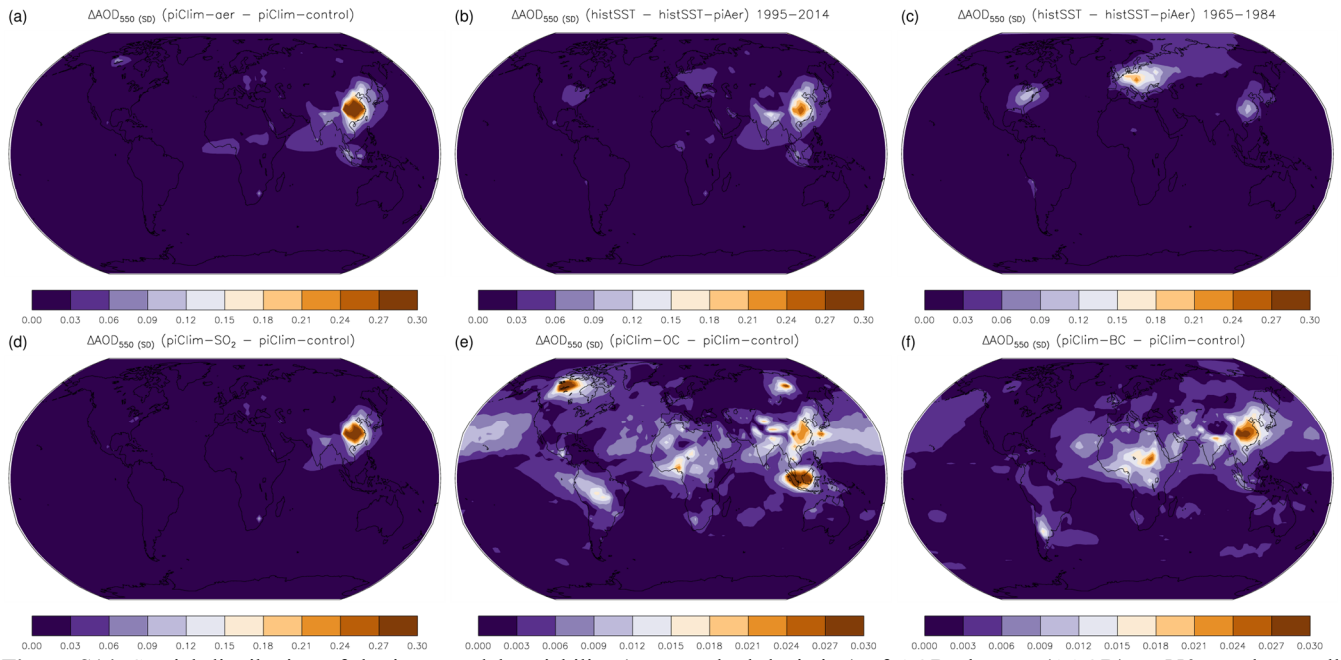

**Figure S14.** Spatial distribution of the inter-model variability (one standard deviation) of AOD changes ( $\Delta AOD$ ) at 550 nm due to all anthropogenic aerosols (a, b, c), sulphates (d), organic carbon (e) and black carbon (f). Mind the different scale in subplots (e) and (f).

SW ERF by Region (histSST - histSST-piAer) 1850-2014 (ENSEMBLE)

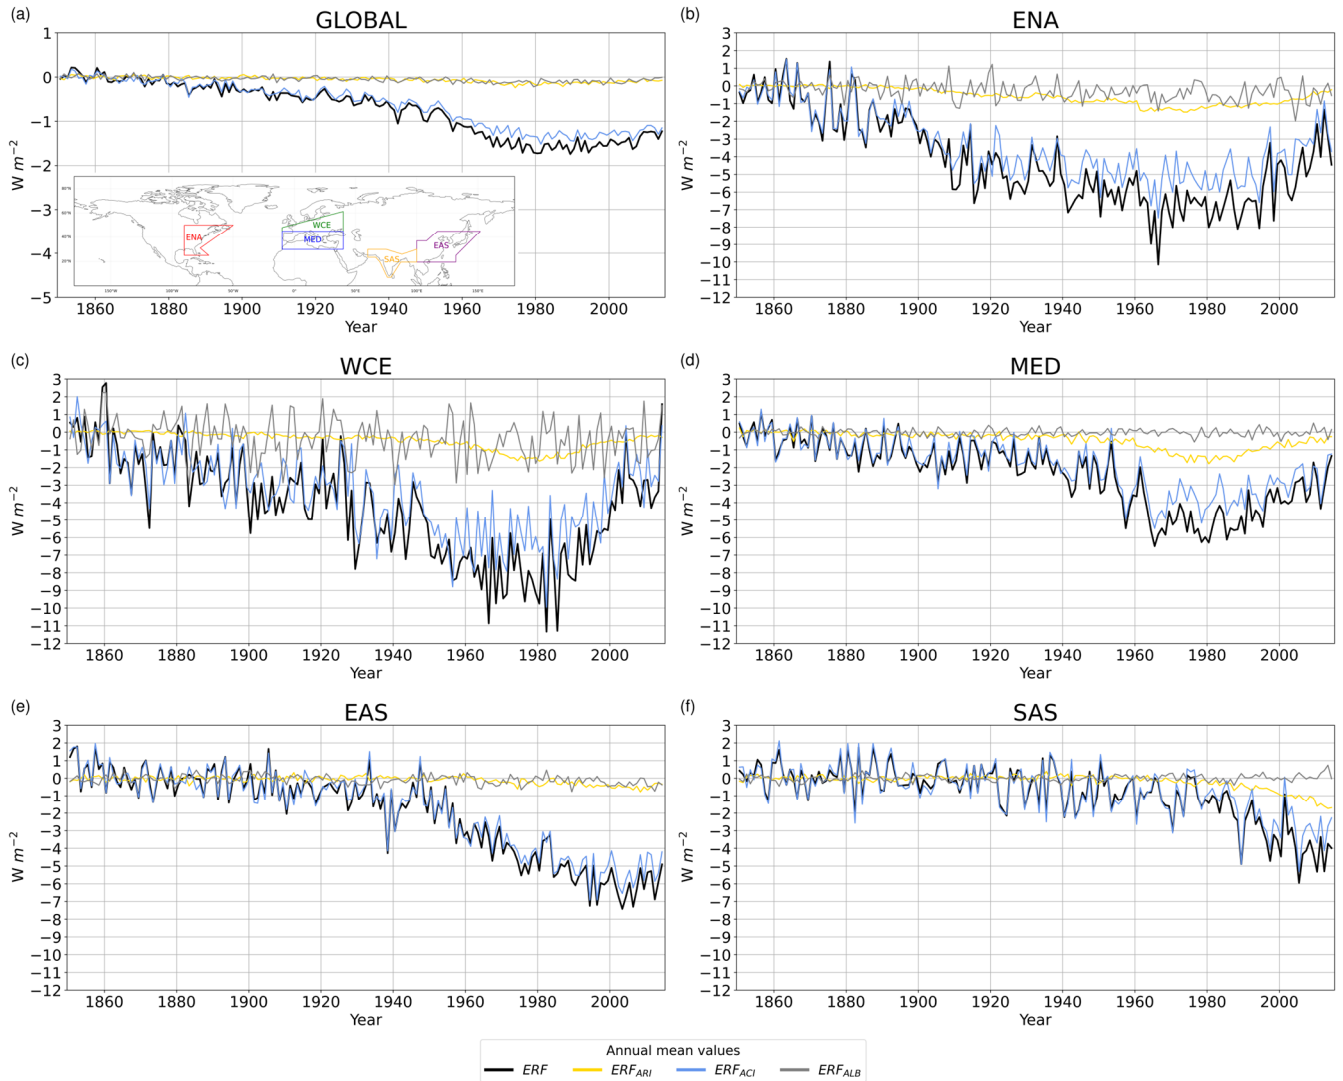

**Figure S15.** Time evolution of the SW ERF,  $ERF_{ARI}$ ,  $ERF_{ACI}$ , and  $ERF_{ALB}$  due to anthropogenic aerosols over the historical period (1850-2014). The results are presented for the histSST experiment on global scale (a), and over East North America (b), West and Central Europe (c), the Mediterranean (d), East Asia (e), and South Asia (f). The boundaries of each region are shown in the embedded map in subplot (a).

LW ERF by Region (histSST - histSST-piAer) 1850-2014 (ENSEMBLE)

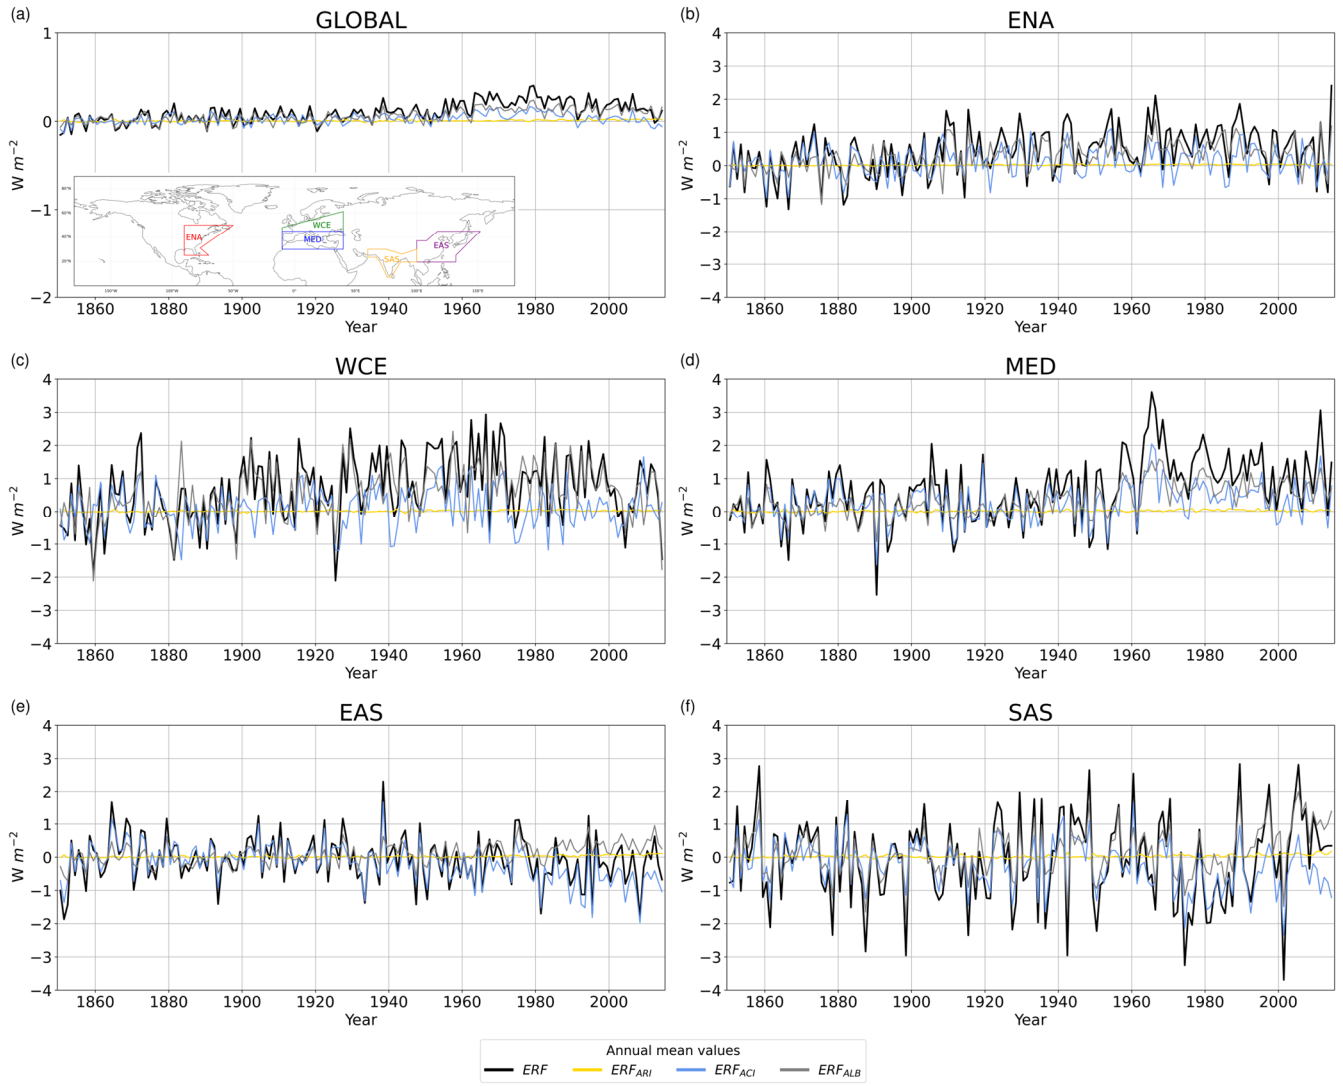

Figure S16. As in Fig. S15, but for the LW.

# Intermodel Variability of Total ERF

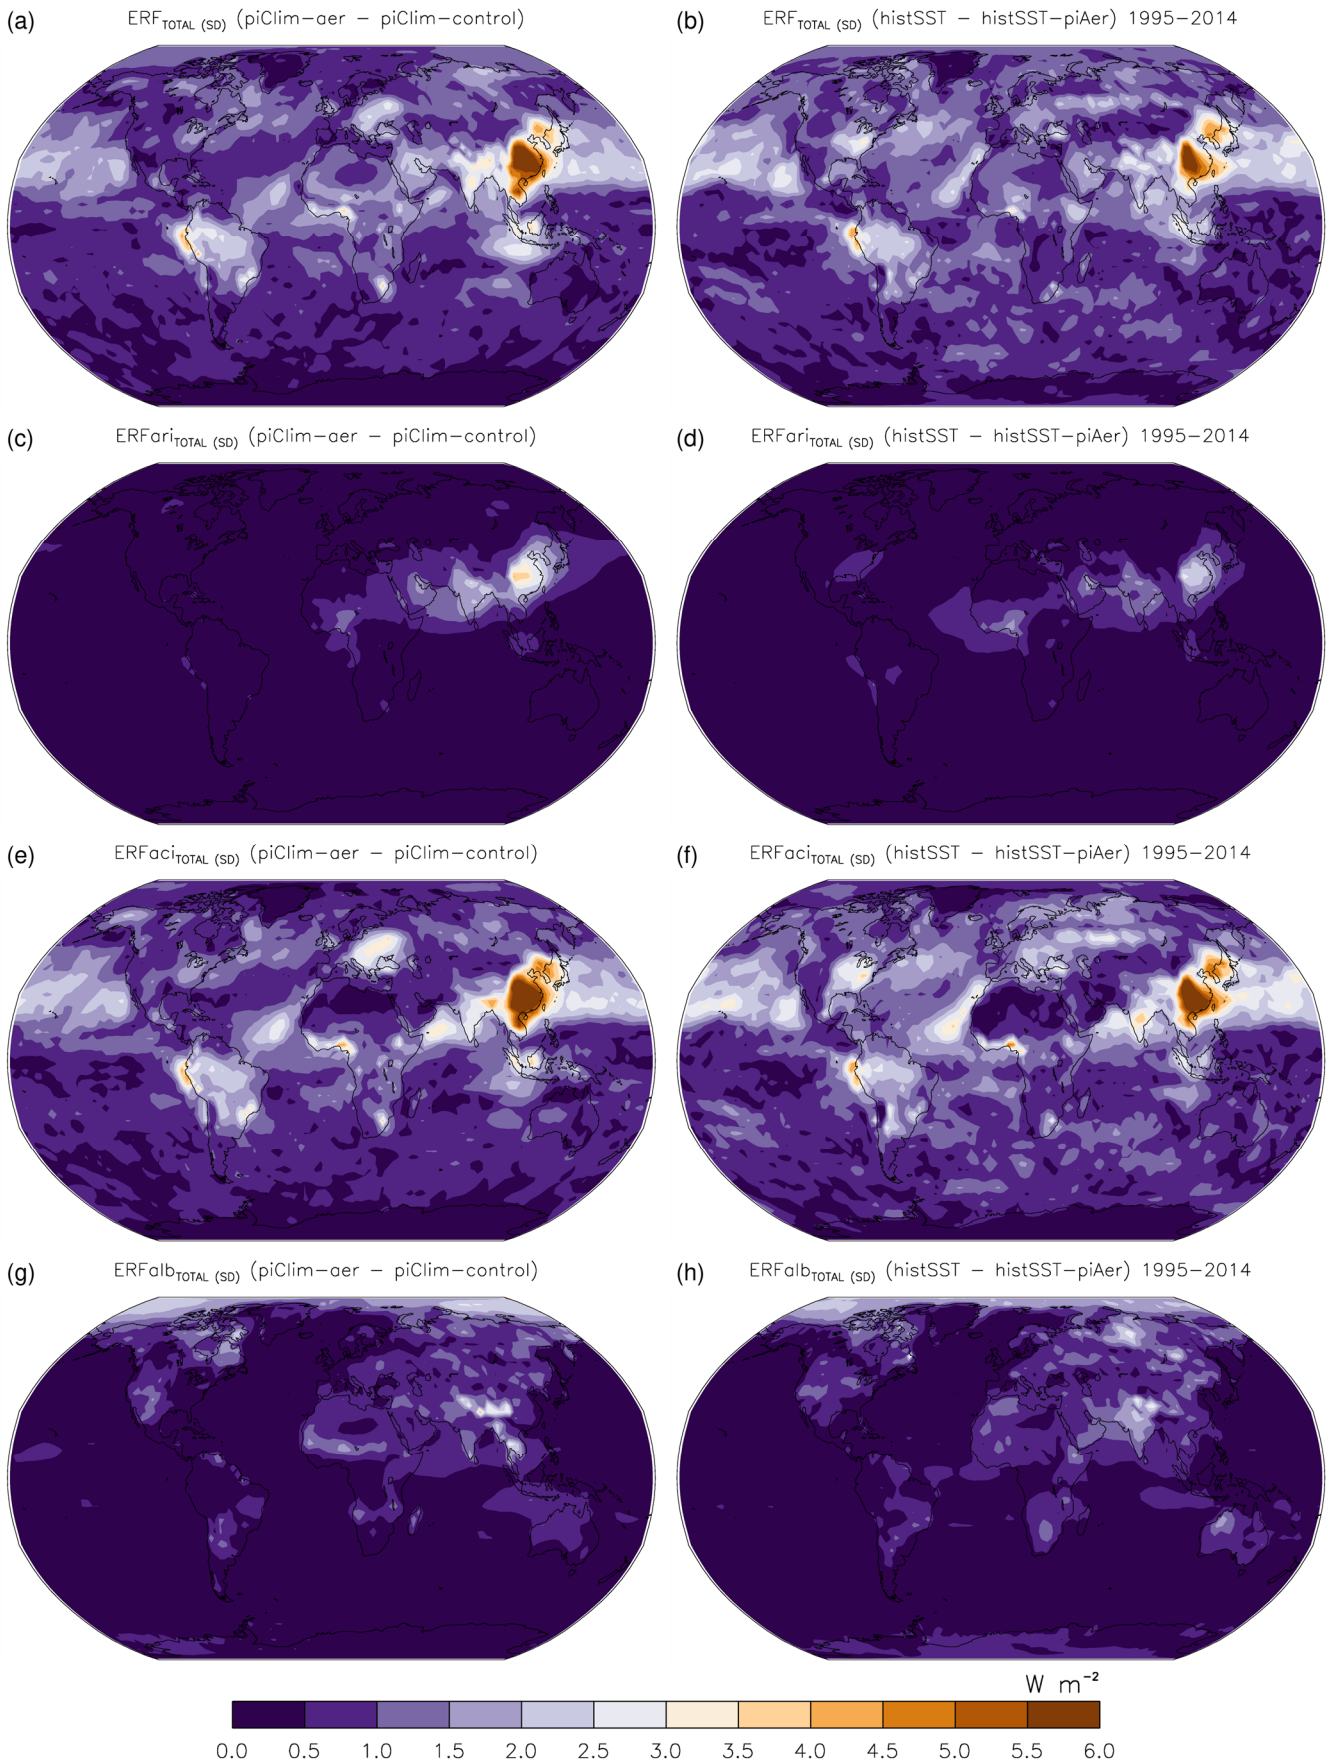

**Figure S17.** Spatial distribution of the inter-model variability (one standard deviation) of total (SW+LW) ERF due to all anthropogenic aerosols. ERF (1<sup>st</sup> row), ERF<sub>ARI</sub> (2<sup>nd</sup> row), ERF<sub>ACI</sub> (3<sup>rd</sup> row), and ERF<sub>ALB</sub> (4<sup>th</sup> row) are presented for the multi-model ensembles of piClim (left column) and histSST (averaged over 1995-2014; right column) experiments, respectively.

# Intermodel Variability of SW ERF

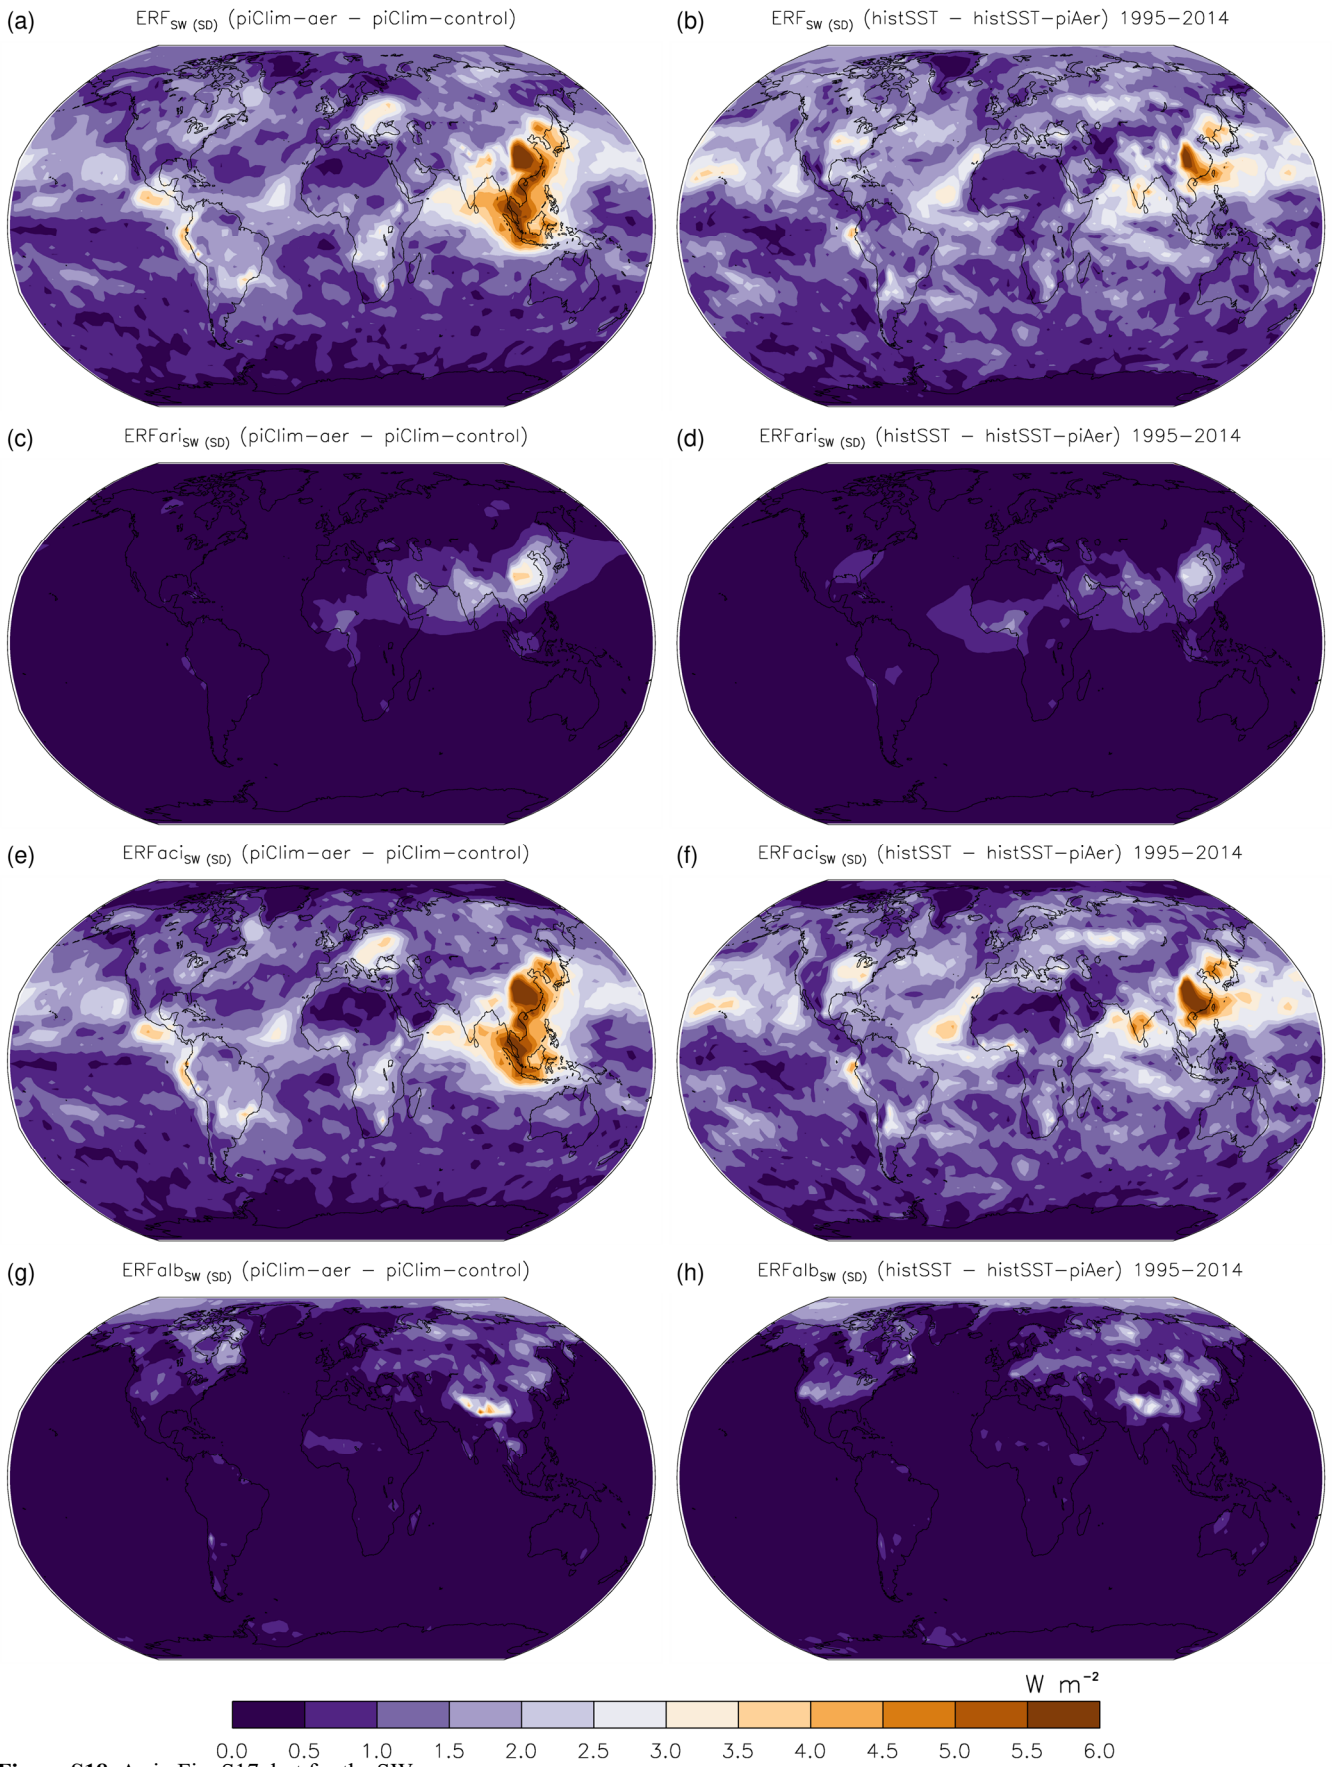

**Figure S18.** As in Fig. S17, but for the SW.

# Intermodel Variability of LW ERF

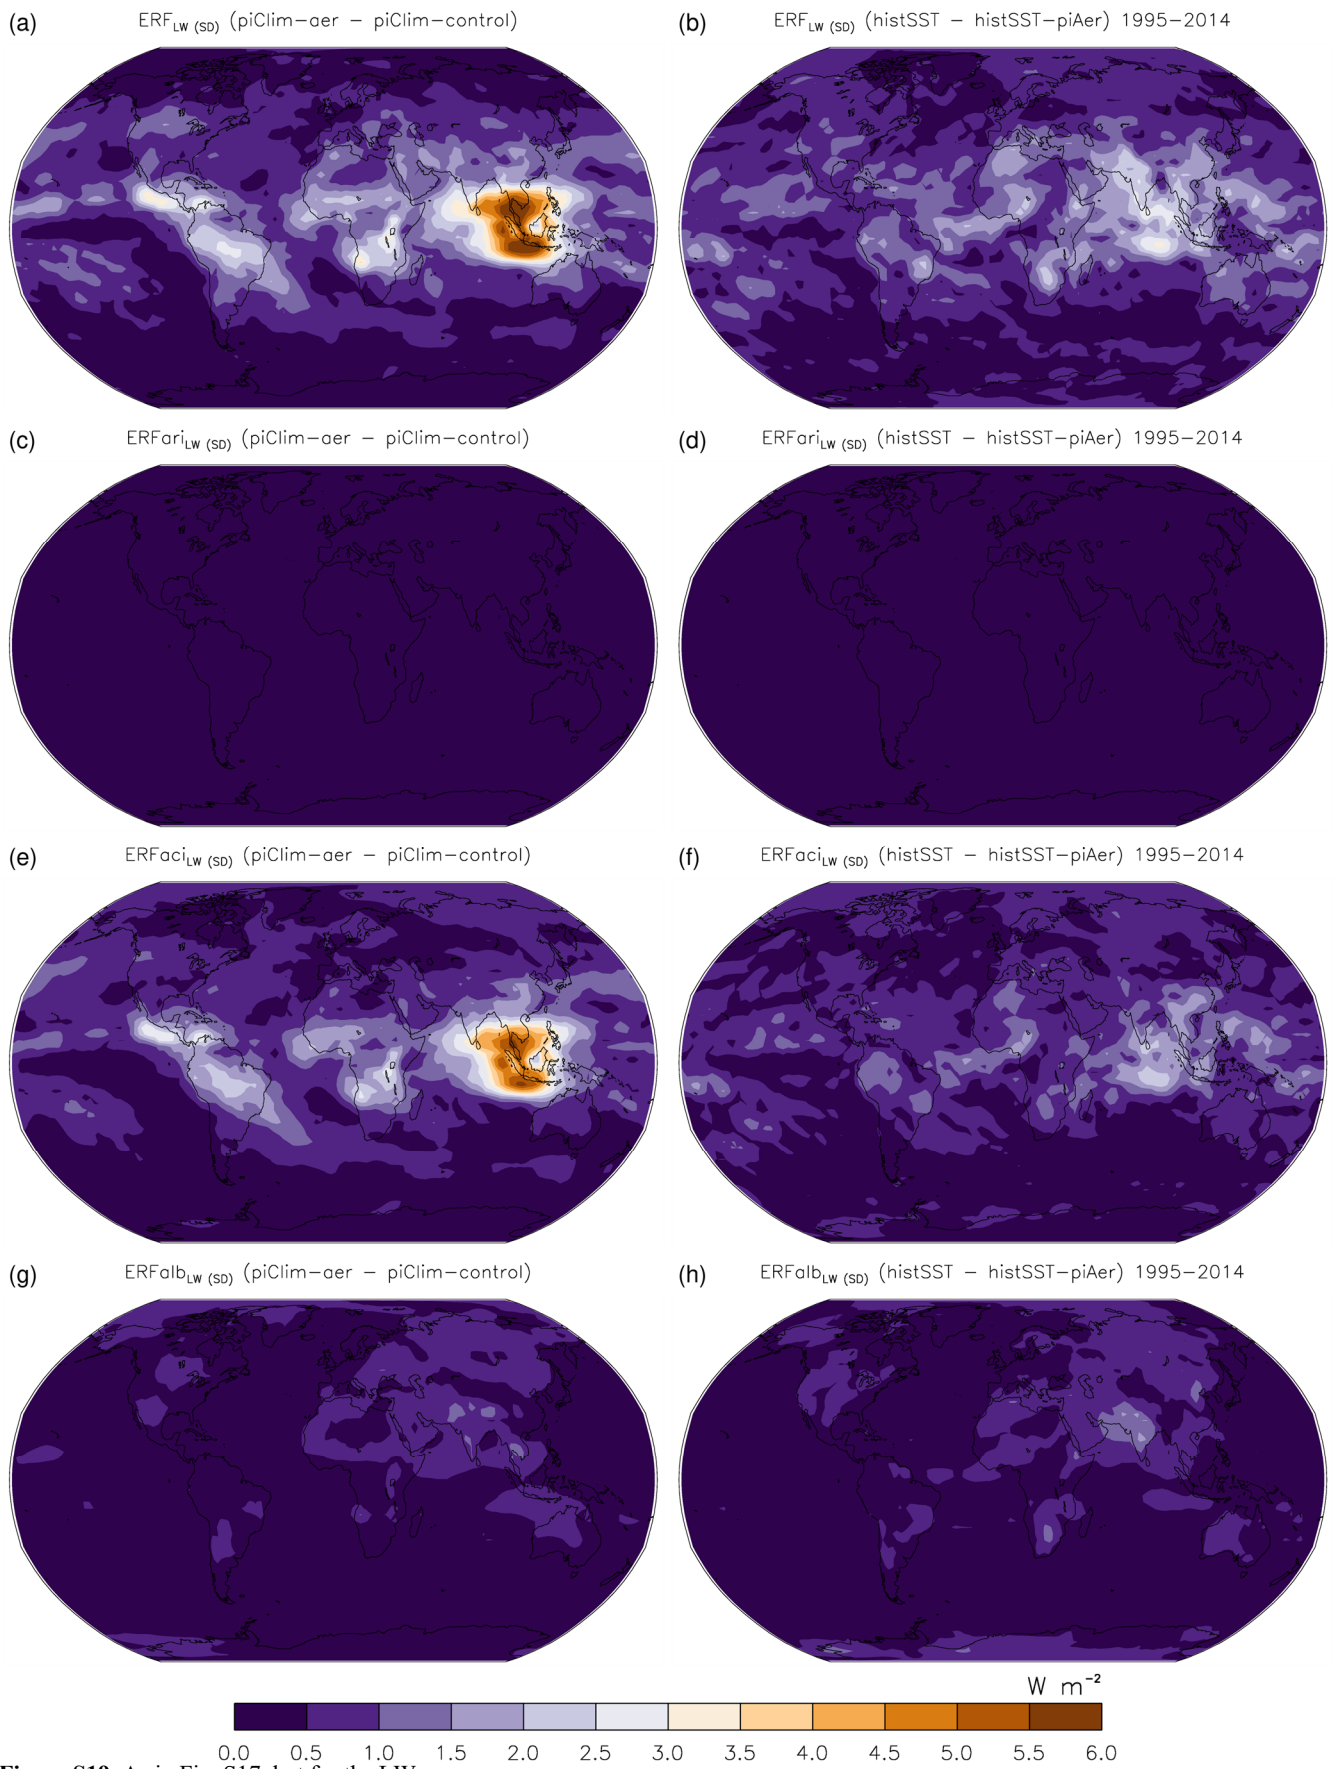

**Figure S19.** As in Fig. S17, but for the LW.

# ENSEMBLE (histSST - histSST-piAer)

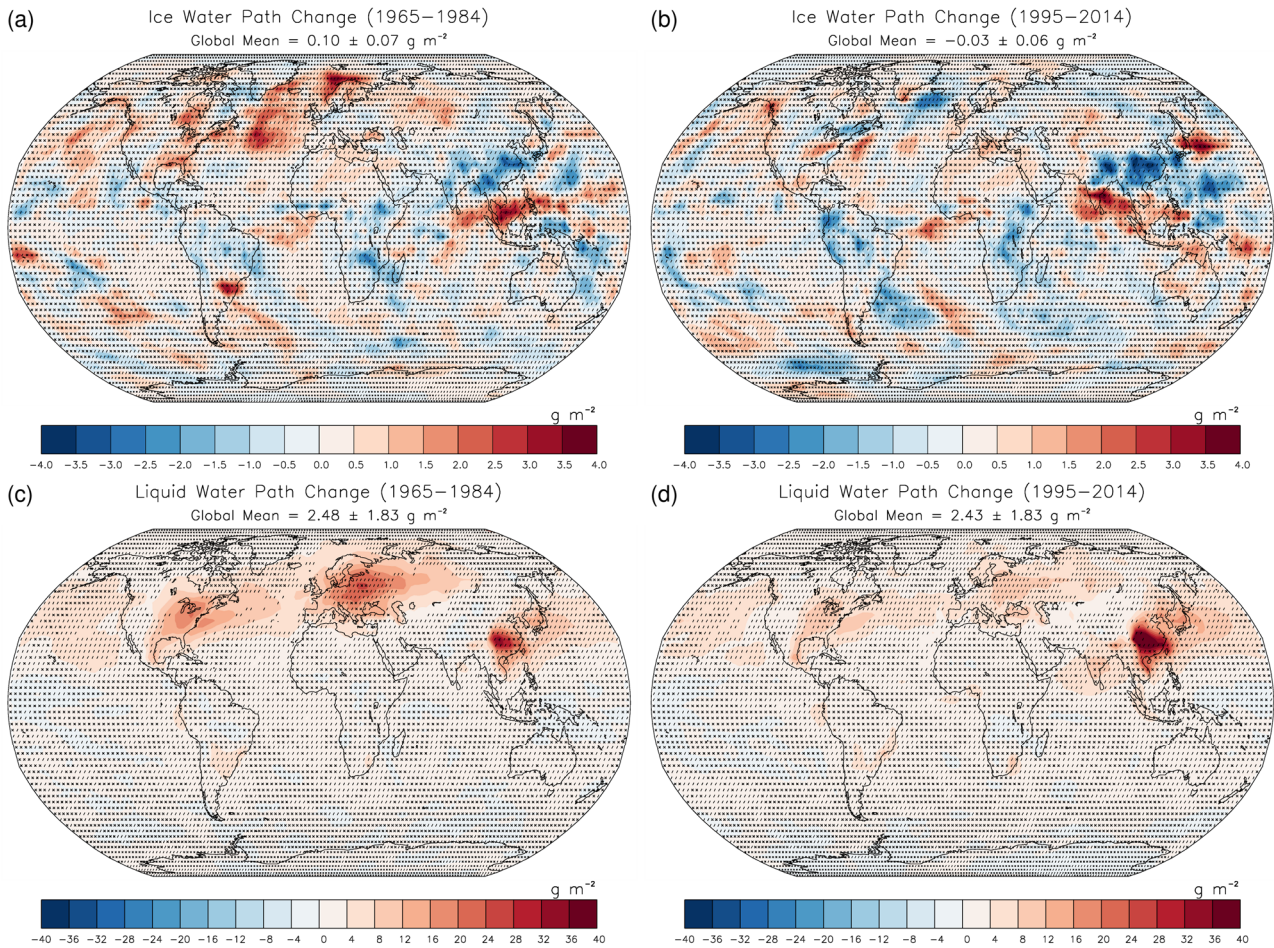

Color Robust signal    
 // No robust signal    
 XX Conflicting signals

**Figure S20.** Spatial distribution of ice water path changes (top row) and liquid water path changes (bottom row) averaged over 1965-1984 (left column) and 1995-2014 (right column) using the histSST experiment. Global means are shown along with the inter-model variability (one standard deviation). Colored areas devoid of markings indicate robust changes, while hatched (/) and cross-hatched (X) areas indicate non-robust changes and conflicting signals, respectively.
